# Supplementary material for: Performance of NO, NO 2 low cost sensors and three calibration approaches within a real world application
Source: Copernicus journal article supplement (doi:10.5194/amt-11-3717-2018), 2018-06-26
Supplement: Supplementary file 1 [file amt-11-3717-2018-supplement.pdf]

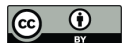

*Supplement of*

## **Performance of NO, NO<sub>2</sub> low cost sensors and three calibration approaches within a real world application**

**Alessandro Bigi et al.**

*Correspondence to:* Alessandro Bigi ([alessandro.bigi@unimore.it](mailto:alessandro.bigi@unimore.it))

The copyright of individual parts of the supplement might differ from the CC BY 4.0 License.

| month     | NO<br>(ppb)         | NO <sub>2</sub><br>(ppb) | T<br>(°C)          | RH<br>(%)          |
|-----------|---------------------|--------------------------|--------------------|--------------------|
| Härkingen |                     |                          |                    |                    |
| 4         | 14.7 (<LOD – 218.3) | 17.0 (1.1 – 75.9)        | 9.5 (-2.3 – 24.5)  | 64.0 (18.8 – 96.6) |
| 5         | 13.8 (<LOD – 190.6) | 16.4 (0.9 – 60.4)        | 15.2 (2.3 – 32.1)  | 67.7 (24.8 – 94.7) |
| 6         | 13.0 (<LOD – 143.6) | 17.0 (1.0 – 57.5)        | 20.6 (6.4 – 33.9)  | 64.0 (22.0 – 90.9) |
| 7         | 15.1 (<LOD – 128.1) | 15.5 (1.1 – 55.9)        | 18.6 (11.8 – 30.6) | 70.4 (37.2 – 91.0) |
| Zurich    |                     |                          |                    |                    |
| 8         | 2.5 (<LOD – 53.7)   | 11.6 (0.0 – 43.6)        | 21.5 (12.2 – 33)   | 66.9 (28.9 – 92.6) |
| 9         | 4.7 (<LOD – 102.9)  | 12.7 (1.4 – 51.1)        | 14.8 (7.0 – 25.8)  | 70.9 (37.2 – 94.0) |
| 10        | 11.8 (<LOD – 164.3) | 17 (1.6 – 52.2)          | 12.7 (2.5 – 23.3)  | 72.7 (24.9 – 98)   |
| 11        | 11 (<LOD – 135.7)   | 16.6 (2.1 – 46.3)        | 6.4 (0.4 – 17.2)   | 75.2 (36 – 92.9)   |
| Lausanne  |                     |                          |                    |                    |
| 8         | 10.4 (<LOD – 109.2) | 19.1 (1.1 – 69.7)        | 21.8 (12.6 – 34.9) | 60.3 (27.7 – 90.5) |
| 9         | 14.0 (<LOD – 266.5) | 19.4 (1.2 – 71.2)        | 15.2 (8.7 – 25.8)  | 65.9 (31.5 – 87.8) |
| 10        | 17.5 (0.2 – 178.8)  | 21.1 (1.1 – 64.6)        | 13.2 (3.8 – 21.1)  | 66.2 (34.4 – 89)   |
| 11        | 18.2 (0.4 – 201.1)  | 19.5 (1.2 – 67.7)        | 6.4 (0.5 – 15.2)   | 70.7 (38.6 – 90.3) |

Table S1: Monthly summary statistics for the calibration and deployment sites. Mean and range (within brackets) are shown for all investigated months. LOD for NO reference instruments is ca. 0.2 ppb

NO

|     | MAE (ppb) |           |           | MBE (ppb) |            |            | R <sup>2</sup> - |            |             | RMSE (ppb)  |             |             |
|-----|-----------|-----------|-----------|-----------|------------|------------|------------------|------------|-------------|-------------|-------------|-------------|
|     | Minimal   | Basic     | S. Repl.  | D. Repl.  | Minimal    | Basic      | S. Repl.         | D. Repl.   | Minimal     | Basic       | S. Repl.    | D. Repl.    |
| MLR | 4.6 ± 1.0 | 4.3 ± 0.9 | 4.4 ± 1.1 | 4.6 ± 0.9 | -0.5 ± 1.5 | -0.1 ± 0.8 | -1.1 ± 1.4       | -1.3 ± 1.3 | 0.84 ± 0.06 | 0.86 ± 0.05 | 0.84 ± 0.07 | 0.85 ± 0.05 |
| SVR | 3.7 ± 1.0 | 3.1 ± 0.8 | 3.8 ± 1.2 | 3.4 ± 0.9 | -0.4 ± 1.9 | 0.1 ± 1.2  | -0.3 ± 2.1       | 0.5 ± 1.4  | 0.88 ± 0.07 | 0.91 ± 0.05 | 0.87 ± 0.07 | 0.90 ± 0.05 |
| RF  | 3.7 ± 1.1 | 3.0 ± 1.0 | 3.8 ± 1.2 | 3.0 ± 1.0 | -0.5 ± 1.8 | -0.4 ± 1.0 | -0.6 ± 1.9       | -0.4 ± 1.0 | 0.87 ± 0.06 | 0.91 ± 0.05 | 0.87 ± 0.07 | 0.90 ± 0.05 |

NO<sub>2</sub>

|     | MAE (ppb) |           |           | MBE (ppb) |            |            | R <sup>2</sup> - |            |             | RMSE (ppb)  |             |             |
|-----|-----------|-----------|-----------|-----------|------------|------------|------------------|------------|-------------|-------------|-------------|-------------|
|     | Minimal   | Basic     | S. Repl.  | D. Repl.  | Minimal    | Basic      | S. Repl.         | D. Repl.   | Minimal     | Basic       | S. Repl.    | D. Repl.    |
| MLR | 4.6 ± 1.3 | 4.4 ± 1.1 | 4.3 ± 1.1 | 4.3 ± 0.4 | -0.2 ± 0.5 | -1.1 ± 0.2 | 0.6 ± 0.6        | -0.8 ± 0.2 | 0.66 ± 0.17 | 0.69 ± 0.16 | 0.70 ± 0.12 | 0.71 ± 0.08 |
| SVR | 4.1 ± 0.9 | 3.4 ± 0.6 | 4.2 ± 0.5 | 3.2 ± 0.6 | -1.0 ± 1.2 | -0.6 ± 1.0 | 0.0 ± 0.8        | -0.6 ± 0.7 | 0.72 ± 0.10 | 0.79 ± 0.06 | 0.71 ± 0.06 | 0.82 ± 0.06 |
| RF  | 4.4 ± 0.9 | 3.3 ± 0.9 | 4.1 ± 0.5 | 3.1 ± 0.7 | -0.1 ± 1.0 | -0.7 ± 0.8 | 0.3 ± 0.9        | -0.5 ± 0.6 | 0.69 ± 0.11 | 0.81 ± 0.09 | 0.73 ± 0.04 | 0.84 ± 0.05 |

Table S2: Comparison of algorithms' performance using the 4 main models in Appendix A in the main manuscript. Mean value ± standard deviation for each index are shown. MAE stands for Mean Absolute Error, MBE for Mean Bias Error, R<sup>2</sup> for the coefficient of determination and RMSE for the root mean of square errors.

| Algorithm       | MAE<br>(ppb) | MBE<br>(ppb) | R <sup>2</sup><br>– | RMSE<br>(ppb) |
|-----------------|--------------|--------------|---------------------|---------------|
| NO              |              |              |                     |               |
| RF              | 3.0 ± 0.9    | -0.3 ± 1.1   | 0.91 ± 0.04         | 5.0 ± 2.0     |
| NO <sub>2</sub> |              |              |                     |               |
| RF              | 2.7 ± 0.8    | -0.2 ± 0.5   | 0.89 ± 0.03         | 3.4 ± 1.1     |

Table S3: Performance of a RF model using both SUs for each site, i.e. 8 EC sensors (see the main manuscript). Mean value  $\pm$  standard deviation for each index are shown. MAE stands for Mean Absolute Error, MBE for Mean Bias Error, R<sup>2</sup> for the coefficient of determination and RMSE for the root mean of square errors.



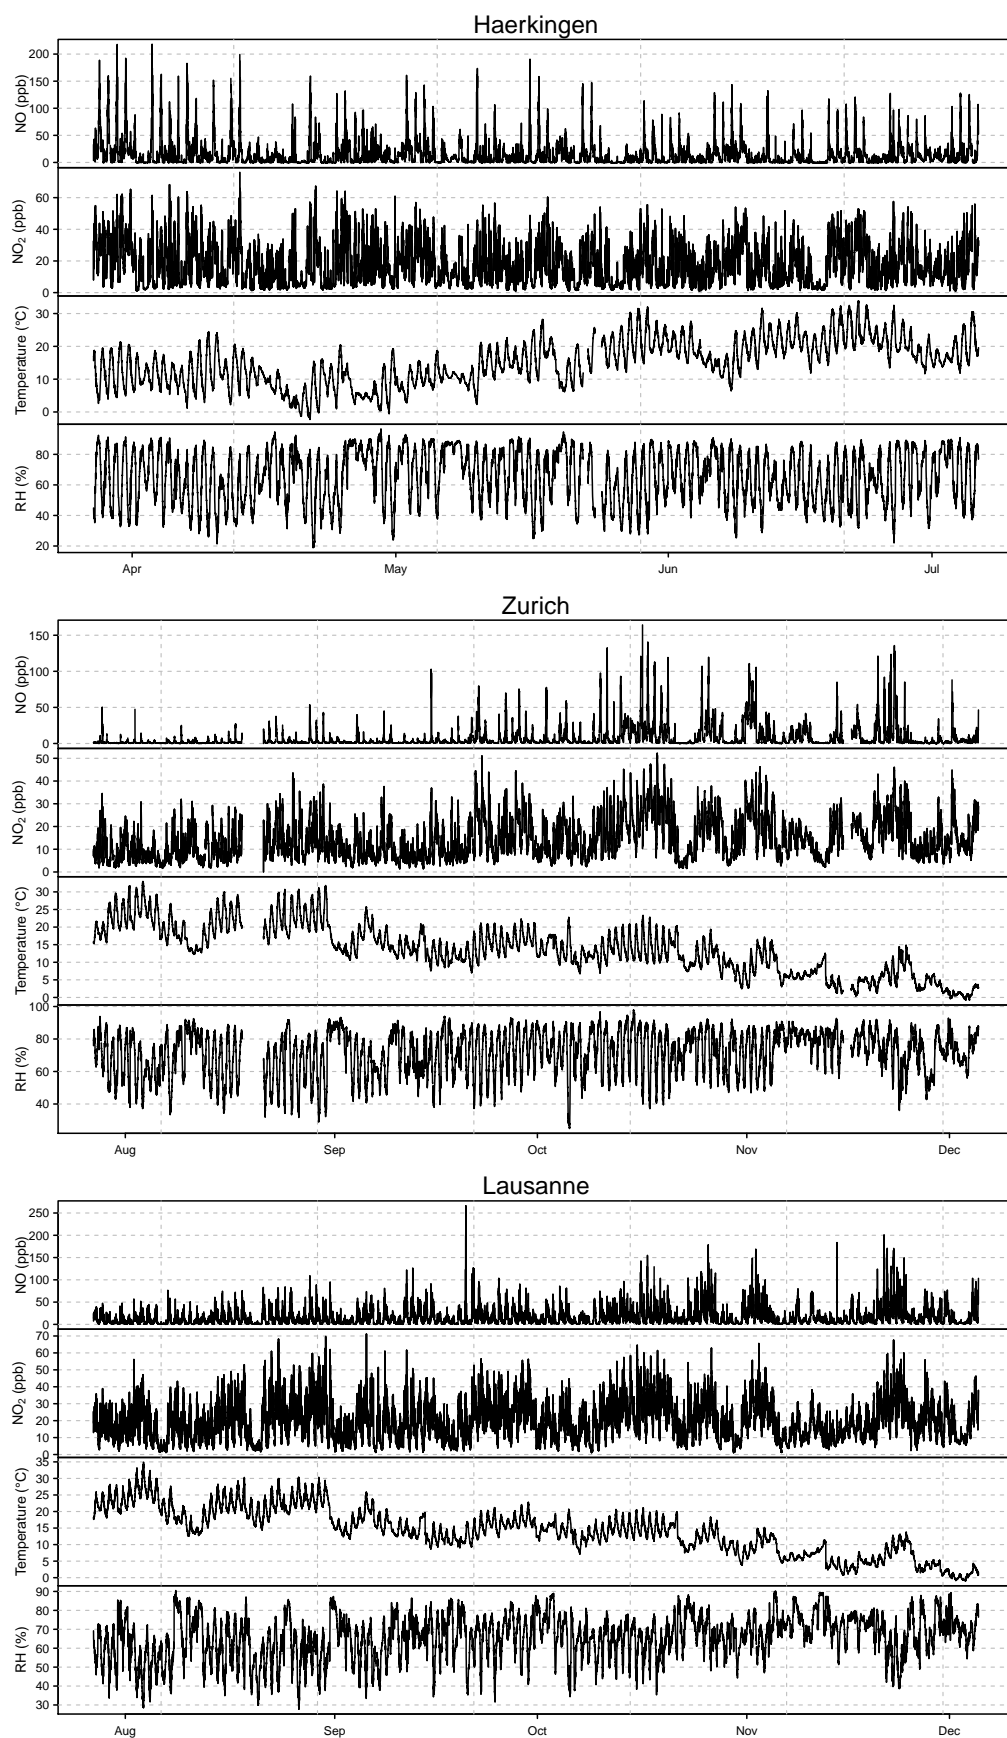

Figure S1: Time series of data collected at the Häerkingen, Zurich and Lausanne reference sites.

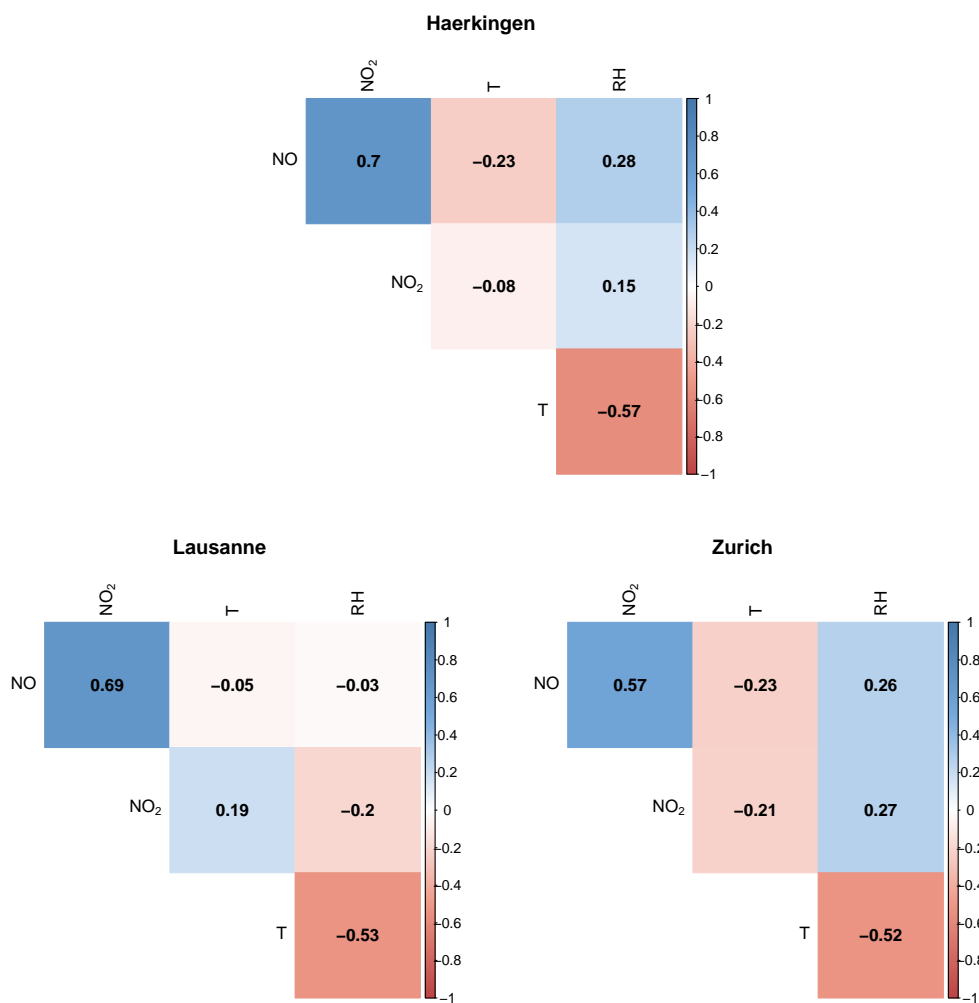

Figure S2: Correlation matrix for meteorological variables and pollutant concentration at the calibration and deployment sites.

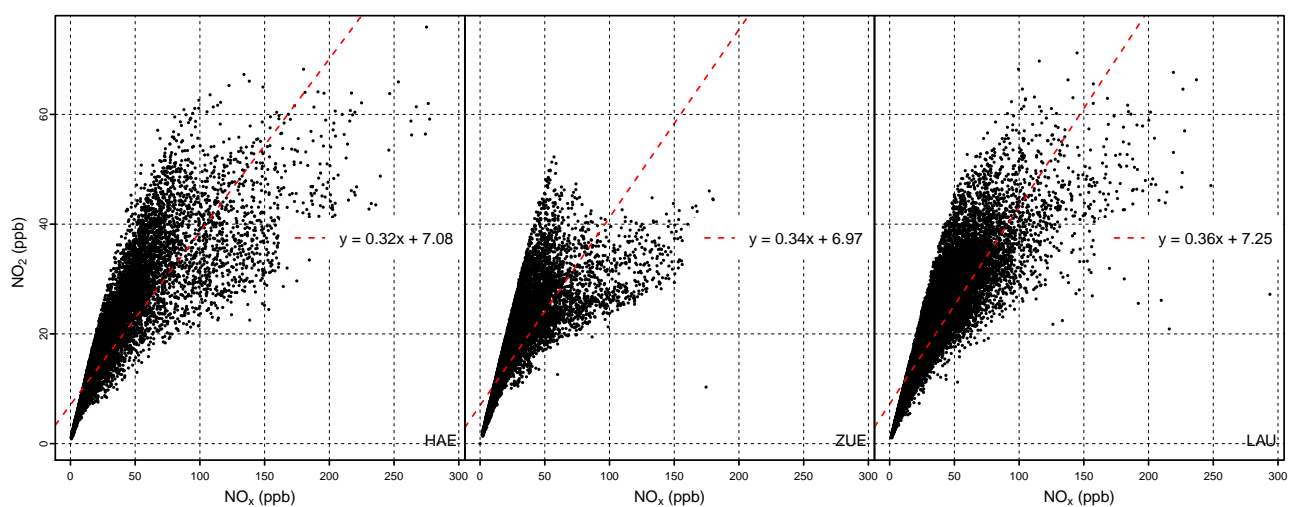

Figure S3: Scatterplot of NO<sub>2</sub> and NO<sub>x</sub> at the three sites. Red dashed line indicates the linear regression model.

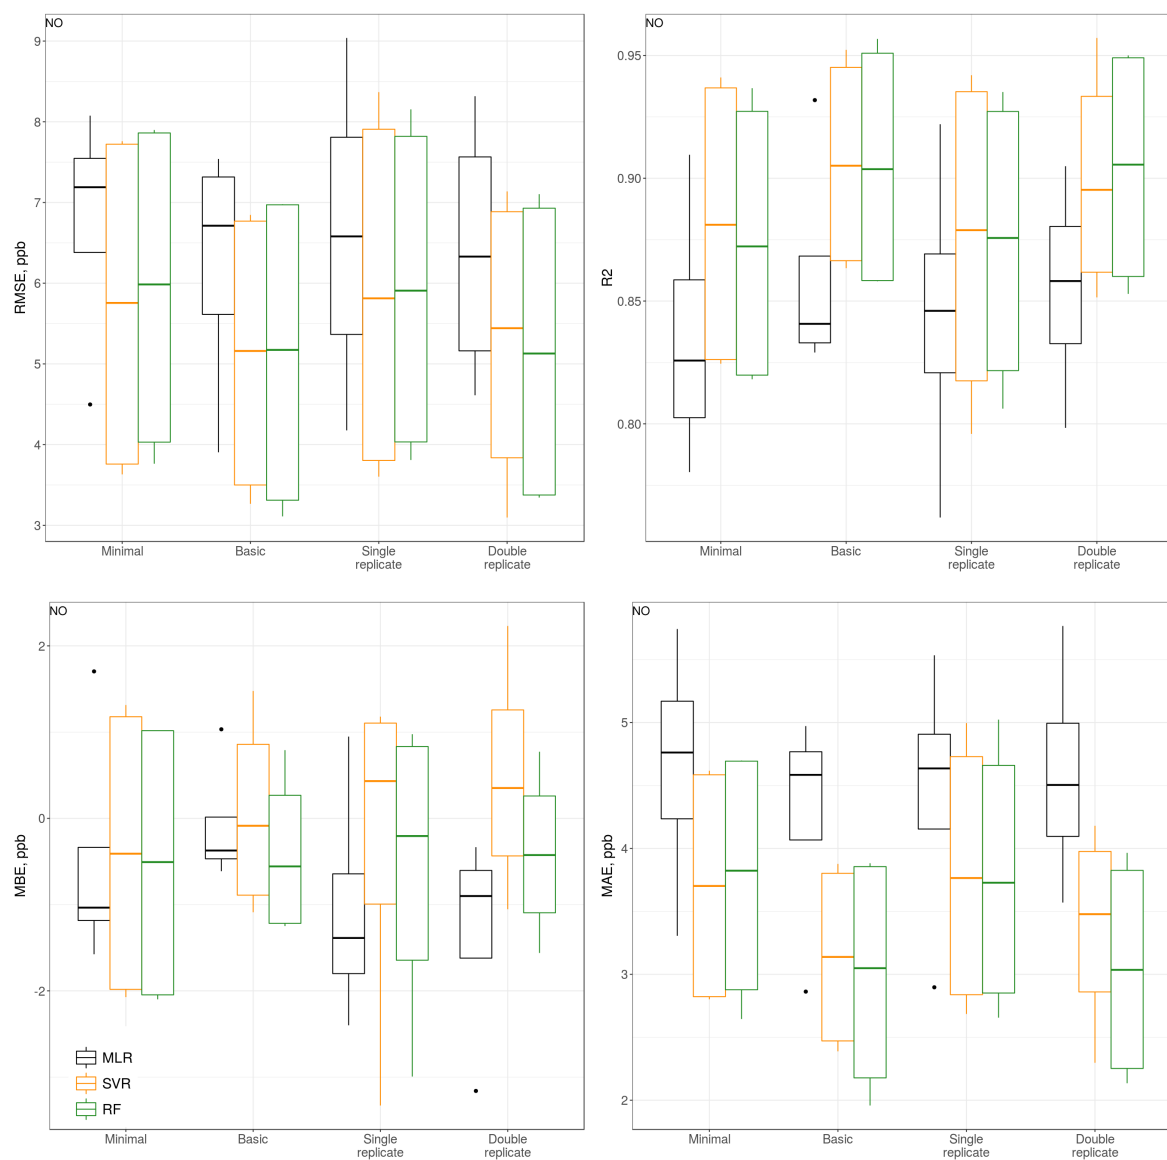

Figure S4: Comparison of goodness-of-fit indexes for the 4 main models listed in Appendix A for the prediction of NO.

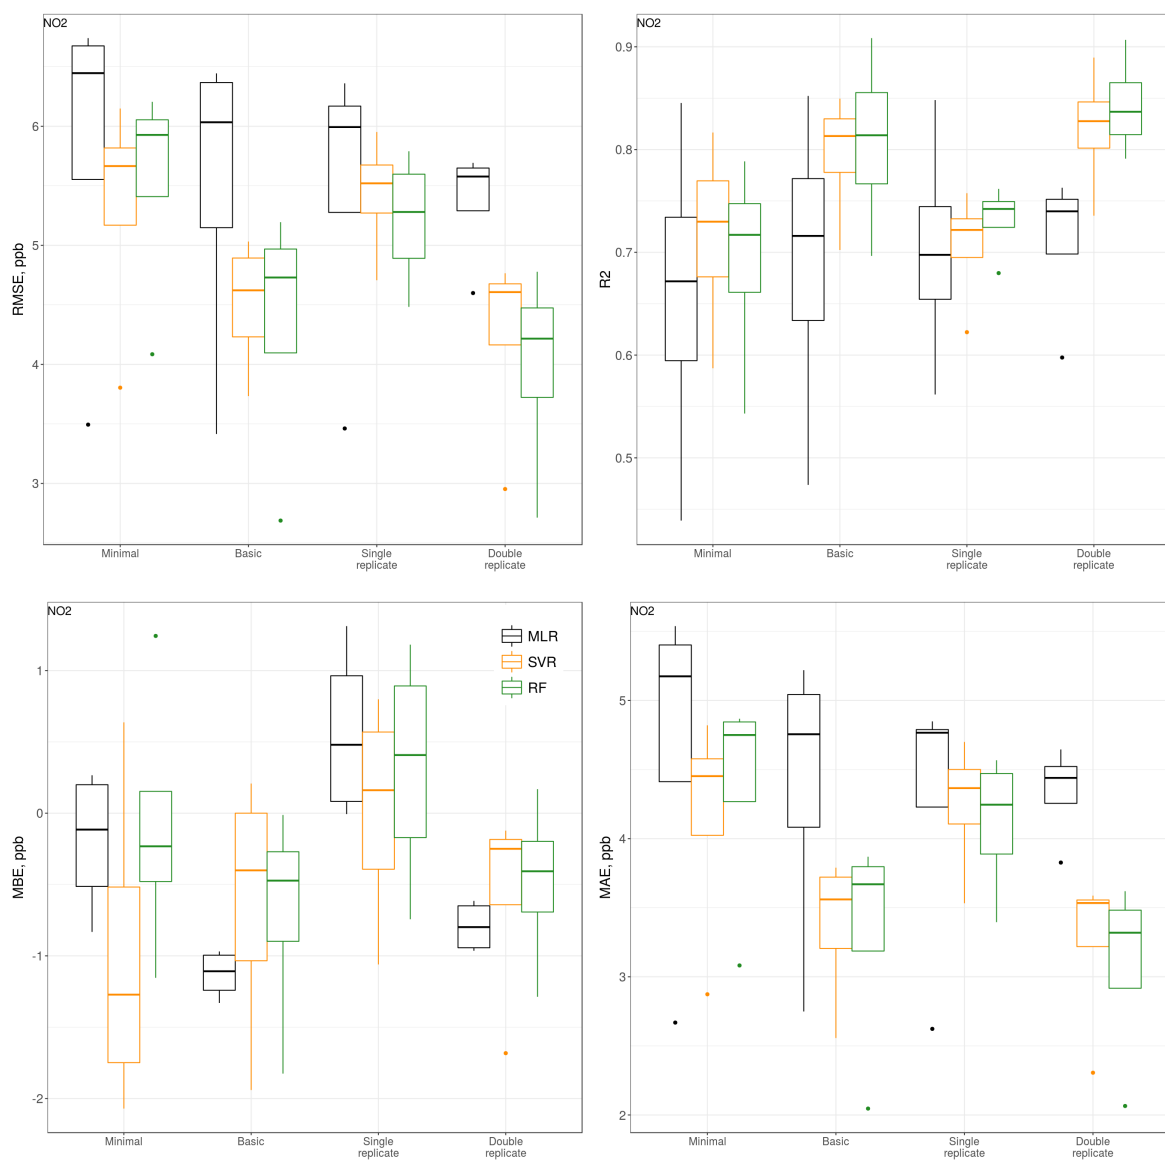

Figure S5: Comparison of goodness-of-fit indexes for the 4 main models listed in Appendix A for the prediction of NO<sub>2</sub>.

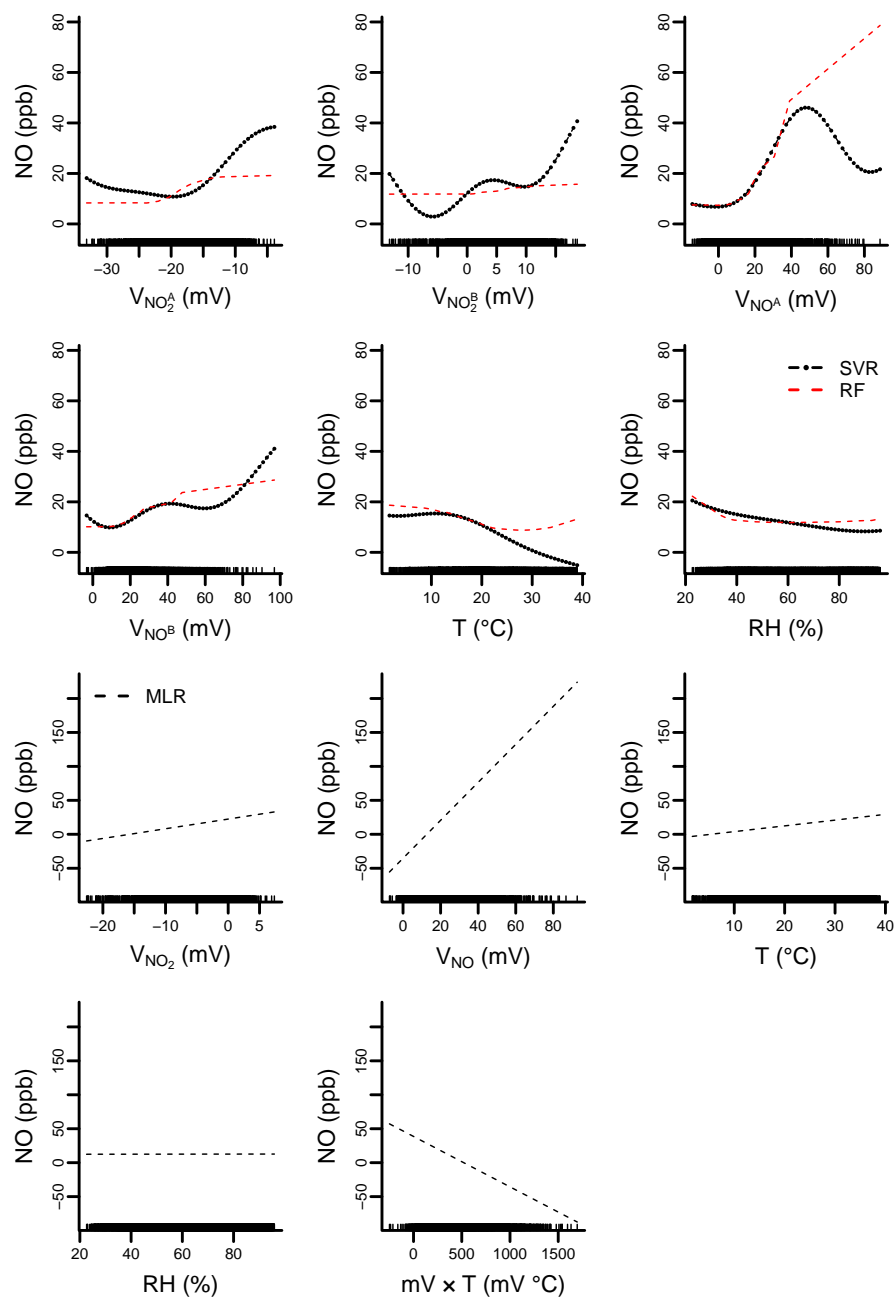

Figure S6: Partial plots for SVM, RF and MLR for the calibration dataset from SU010, NO. Rug on the abscissa indicates the range of the covariate.

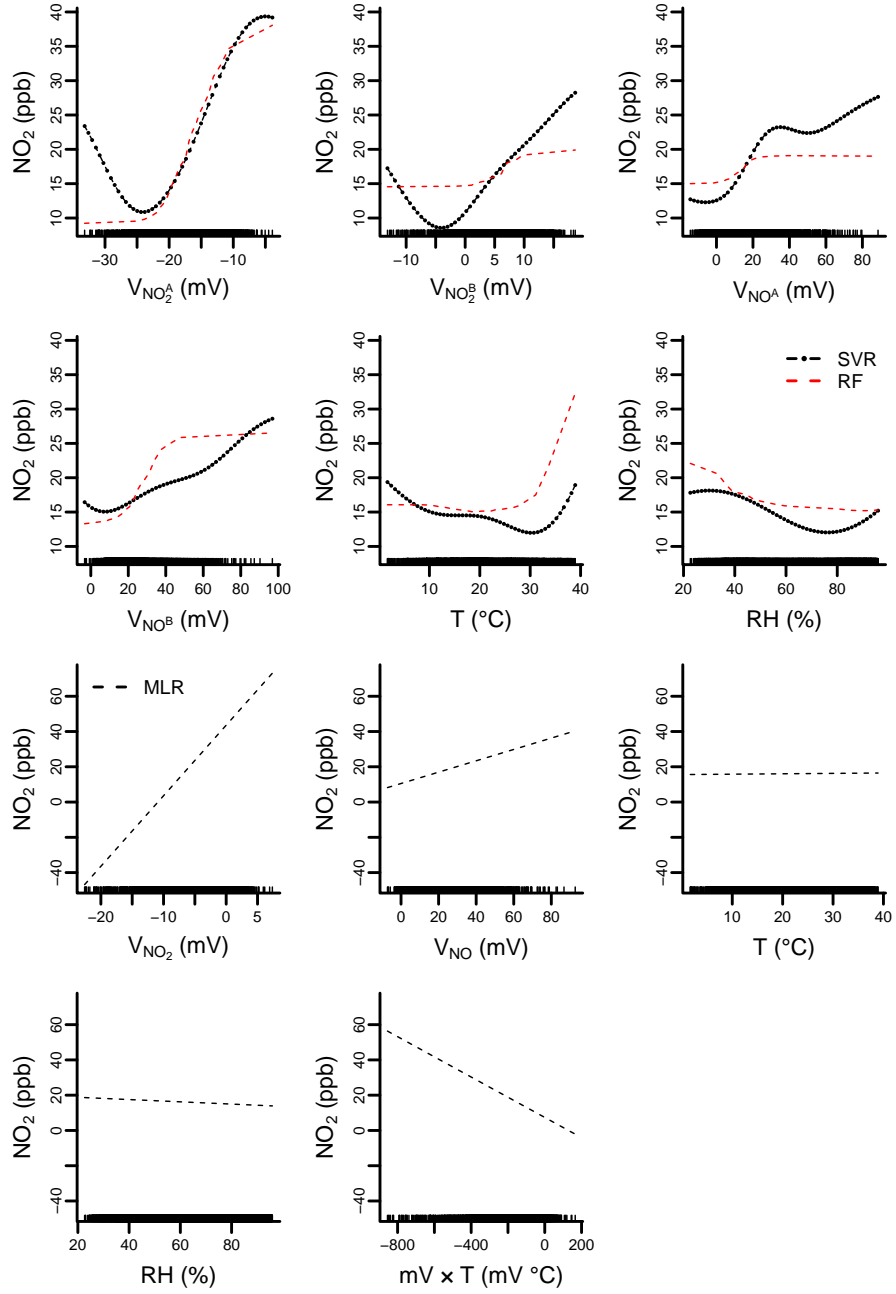

Figure S7: Partial plots for SVM, RF and MLR for the calibration dataset from SU010,  $\text{NO}_2$ . Rug on the abscissa indicates the range of the covariate.

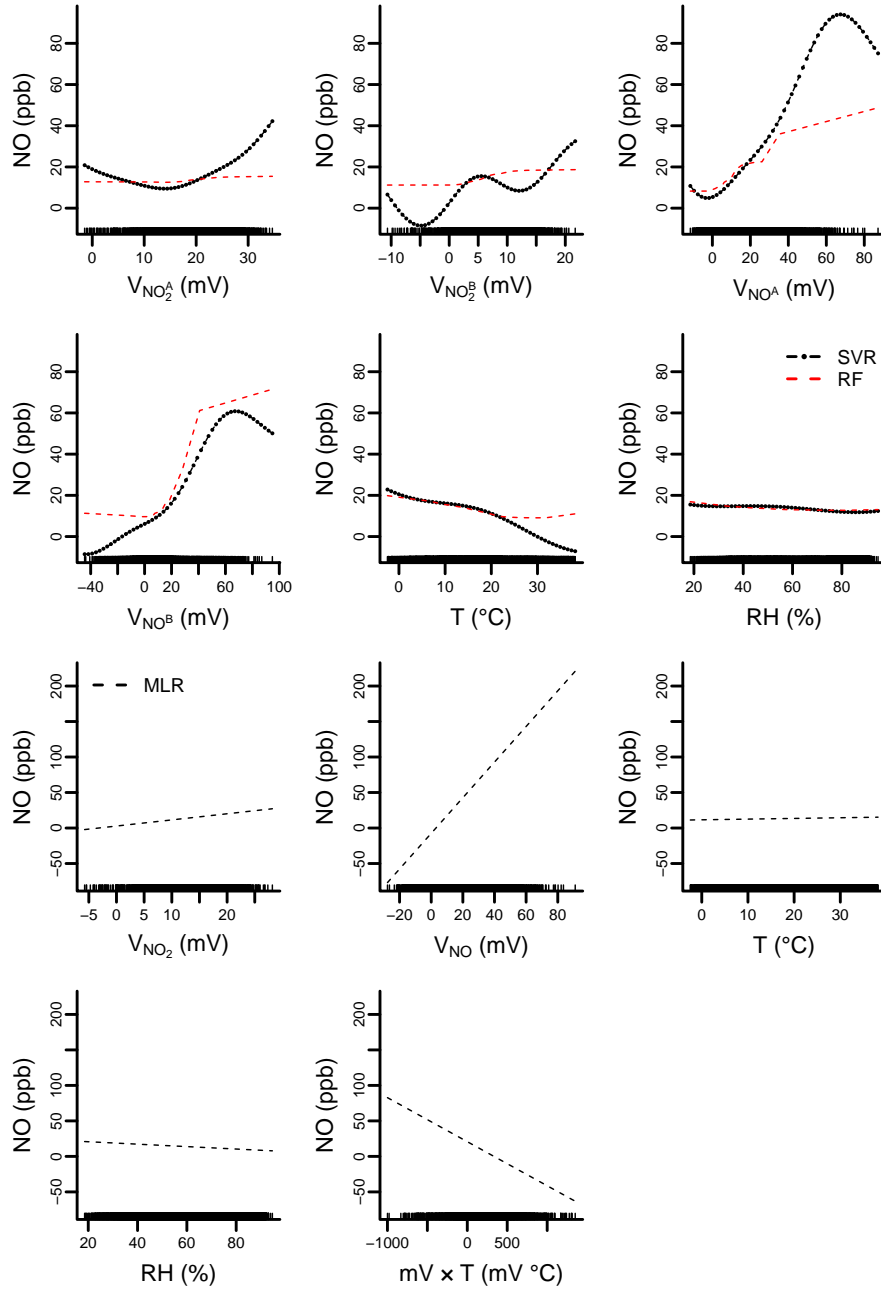

Figure S8: Partial plots for SVM, RF and MLR for the calibration dataset from SU011, NO. Rug on the abscissa indicates the range of the covariate.

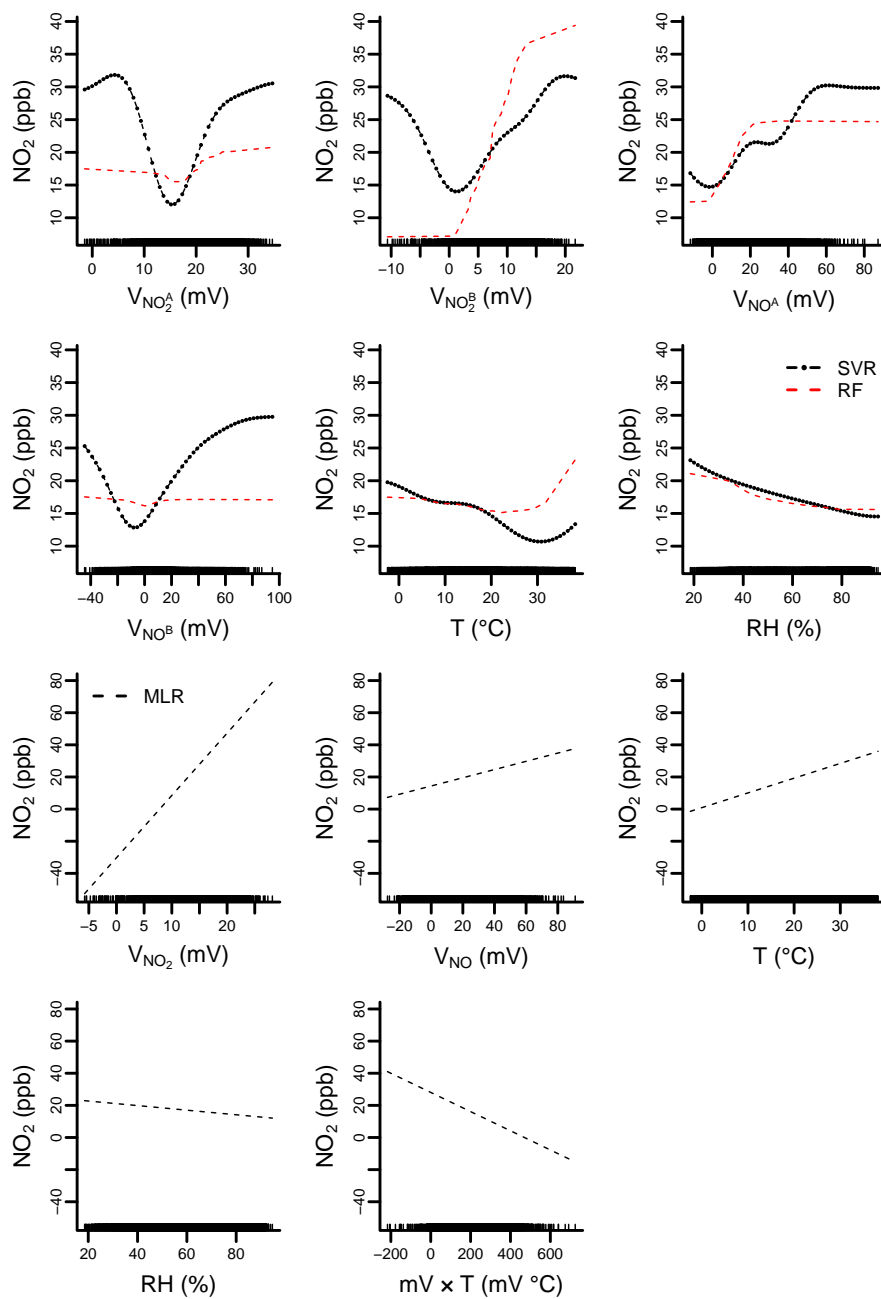

Figure S9: Partial plots for SVM, RF and MLR for the calibration dataset from SU011,  $\text{NO}_2$ . Rug on the abscissa indicates the range of the covariate.



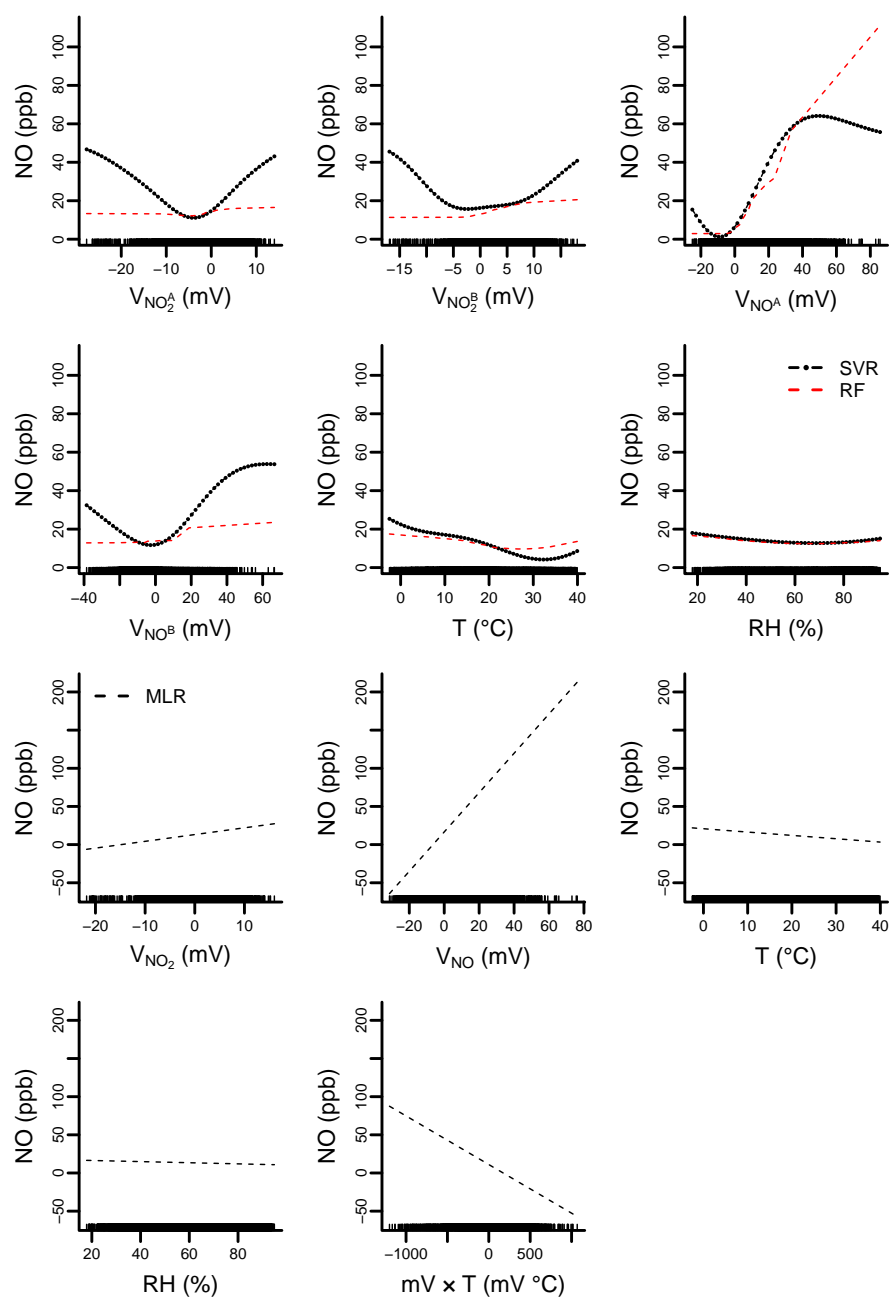

Figure S10: Partial plots for SVM, RF and MLR for the calibration dataset from SU012, NO. Rug on the abscissa indicates the range of the covariate.

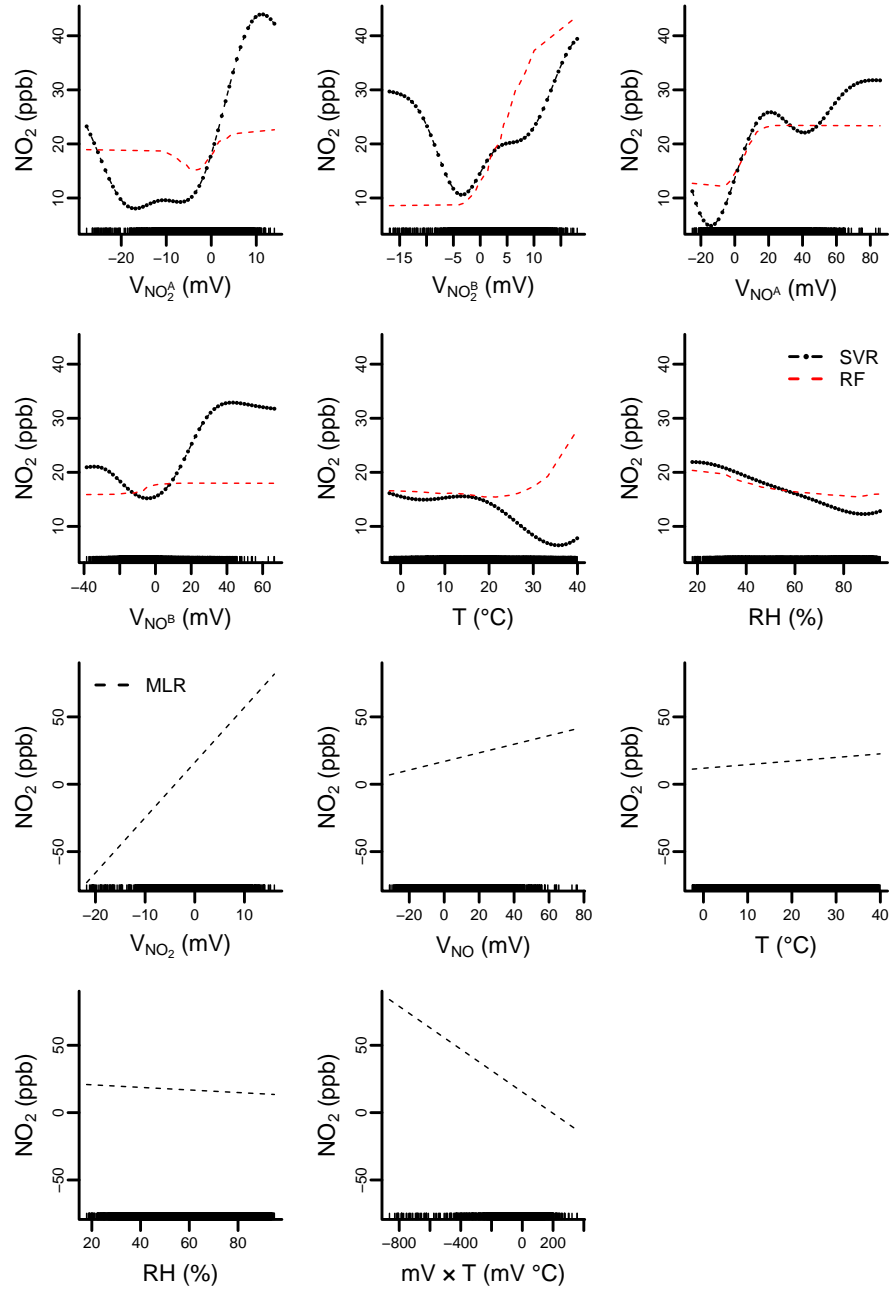

Figure S11: Partial plots for SVM, RF and MLR for the calibration dataset from SU012,  $\text{NO}_2$ . Rug on the abscissa indicates the range of the covariate.

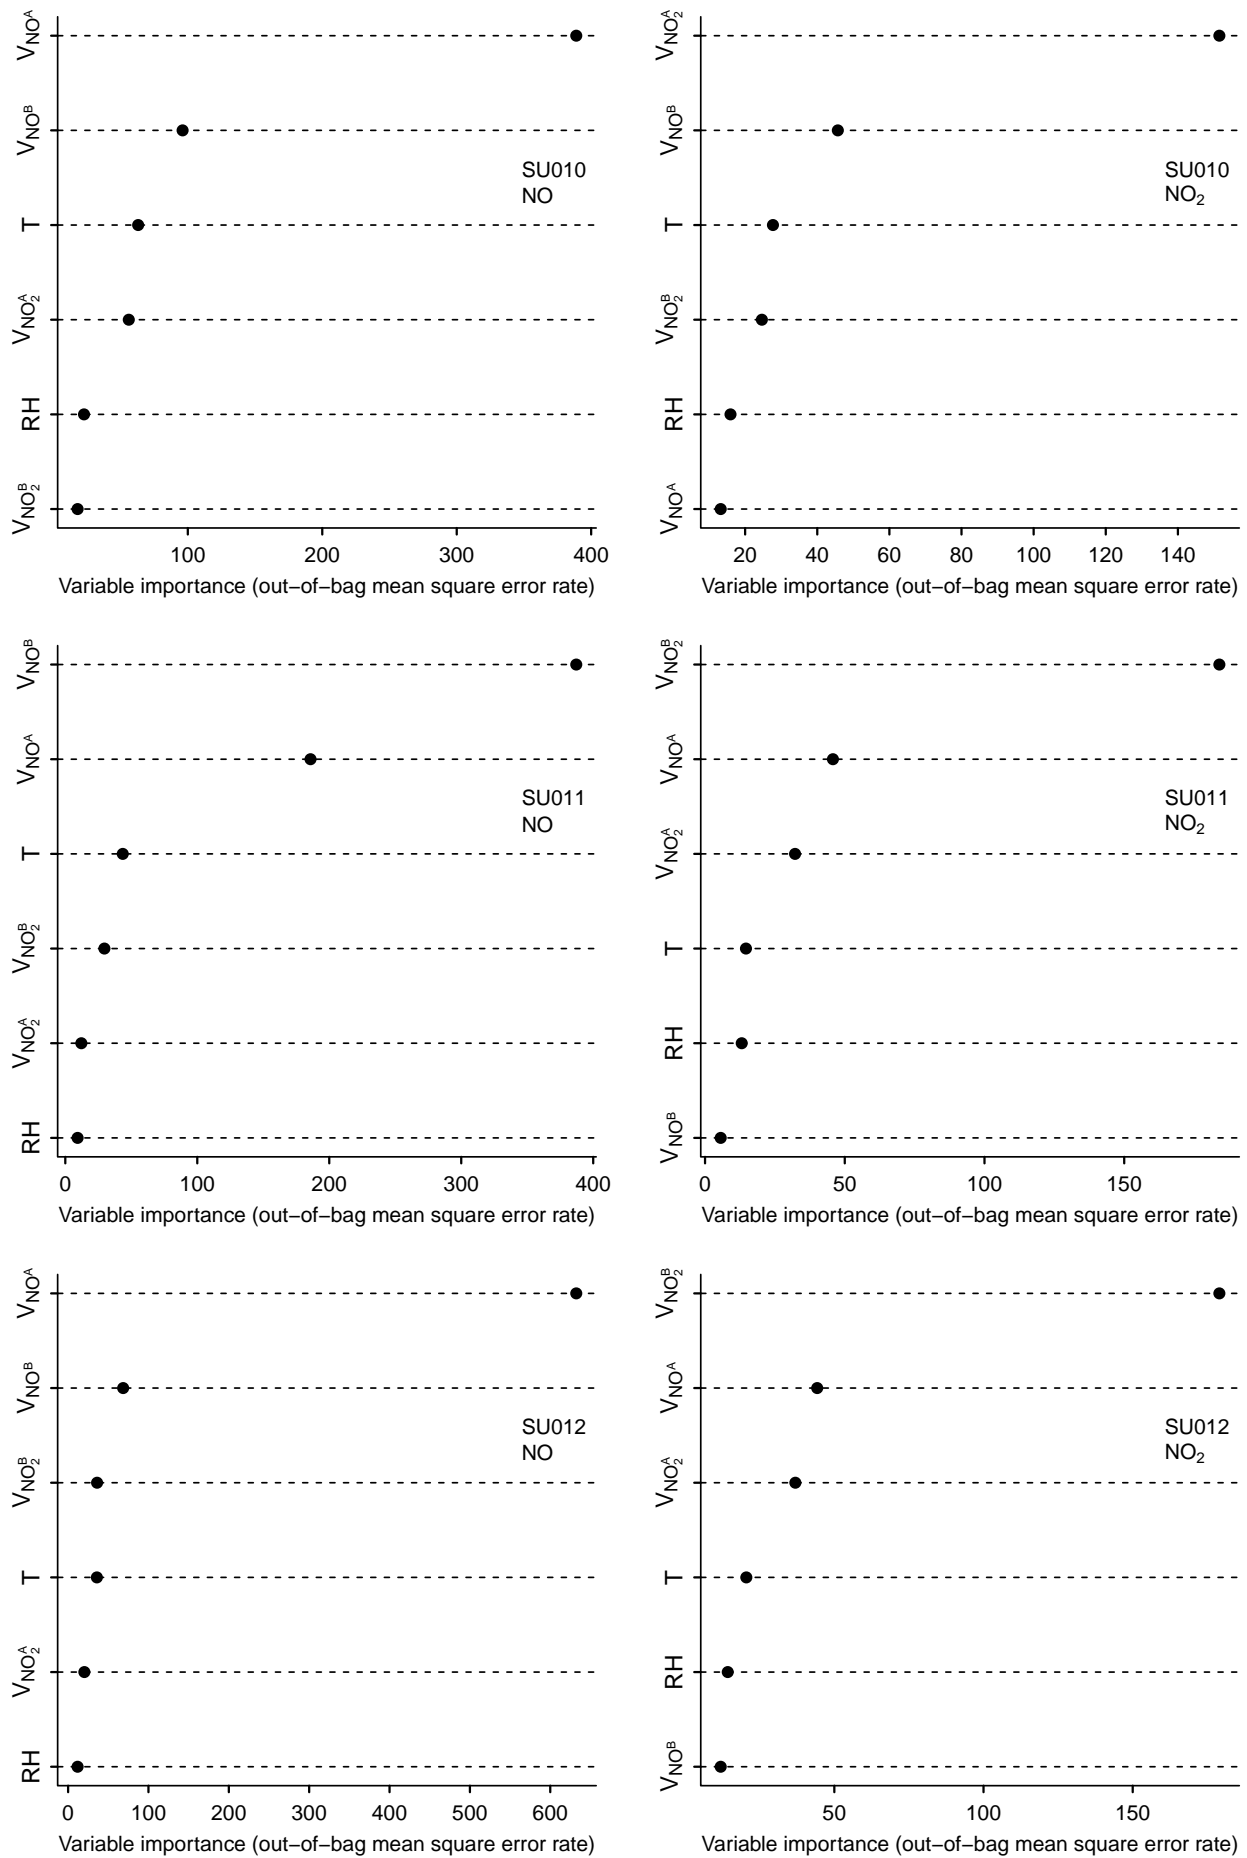

Figure S12: Variable importance plot for the prediction by SU010, SU011 and SU012 of NO and NO<sub>2</sub>.

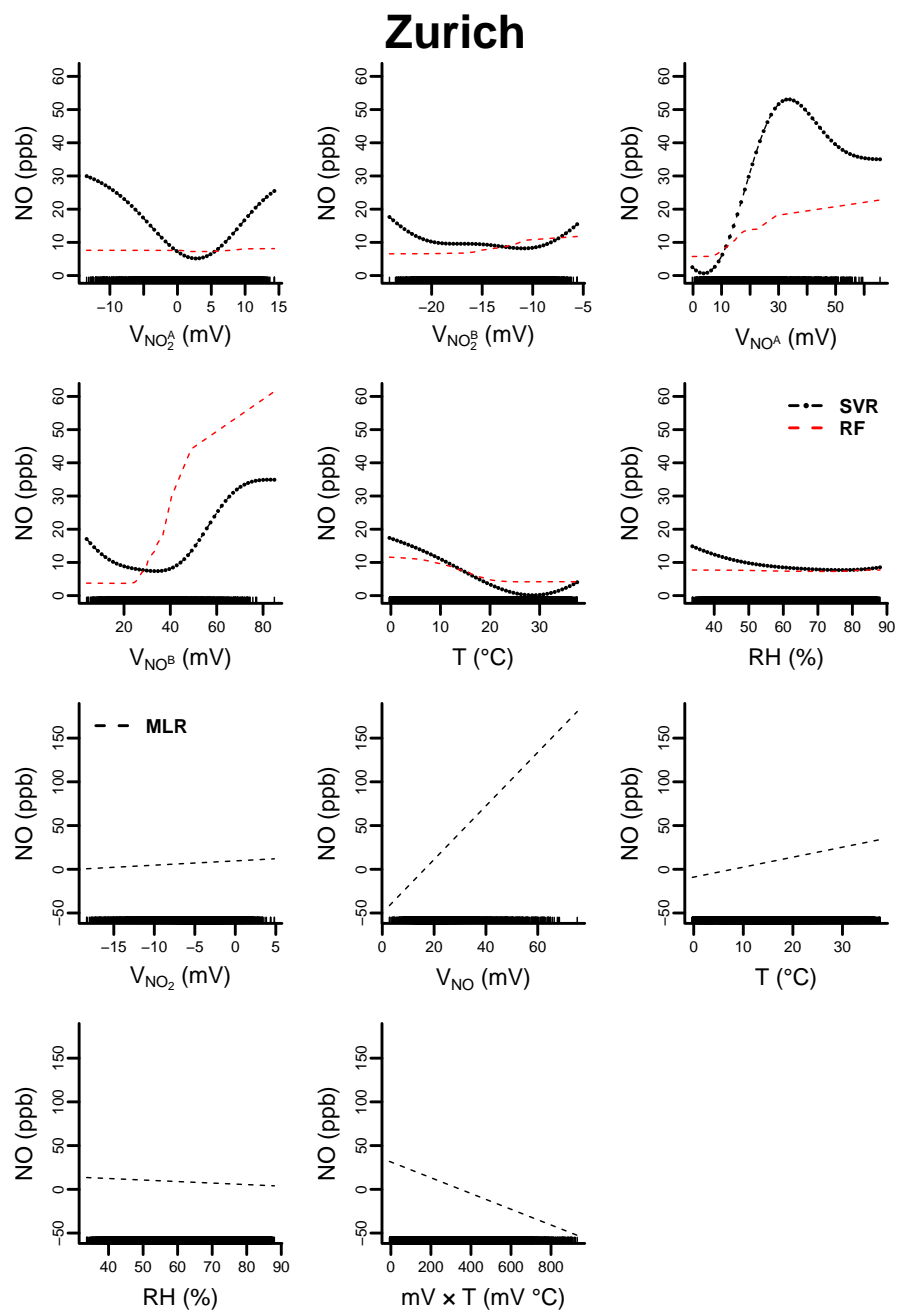

Figure S13: Partial plots for SVM, RF and MLR for the deployment dataset from SU009, NO. Rug on the abscissa indicates the range of the covariate.

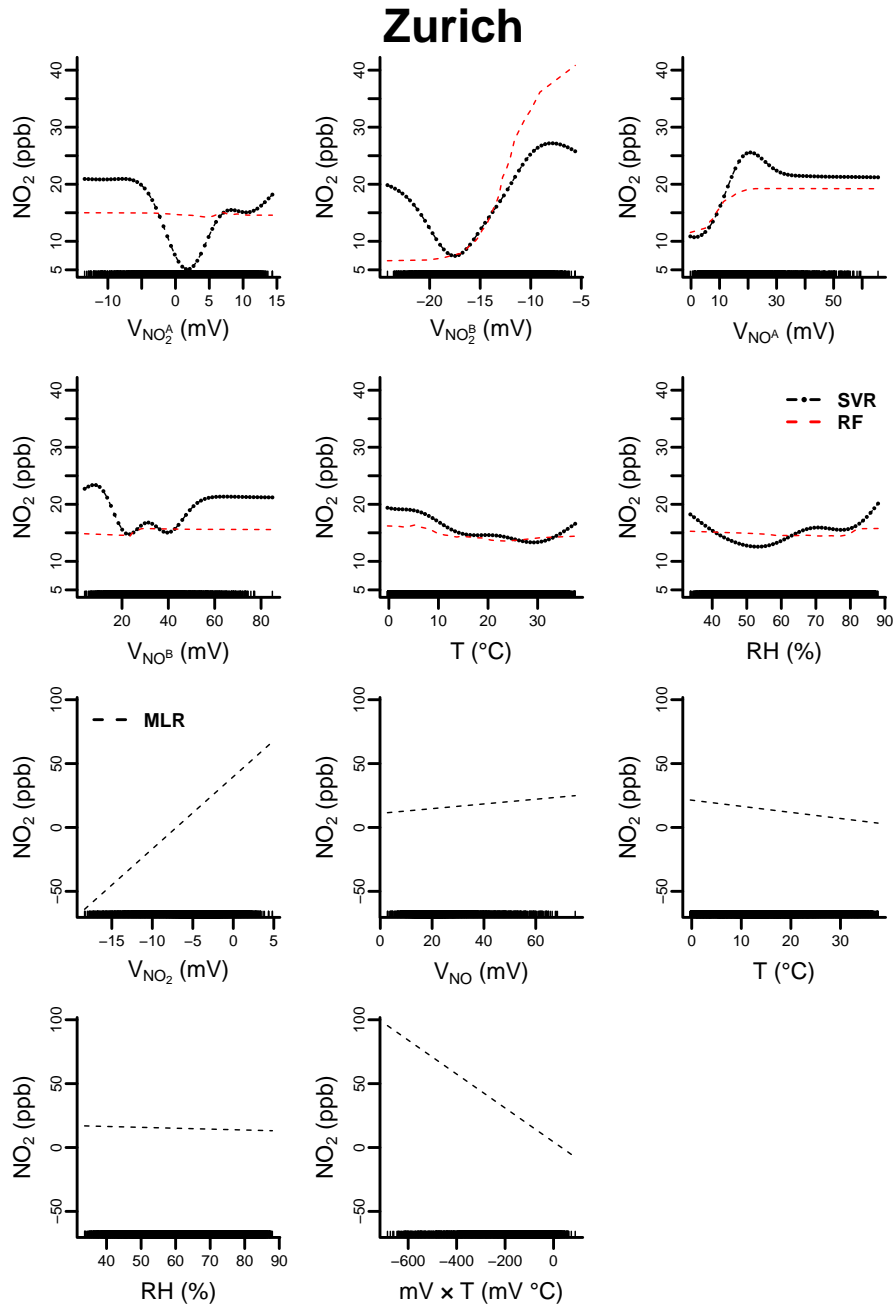

Figure S14: Partial plots for SVM, RF and MLR for the deployment dataset from SU009,  $\text{NO}_2$ . Rug on the abscissa indicates the range of the covariate.

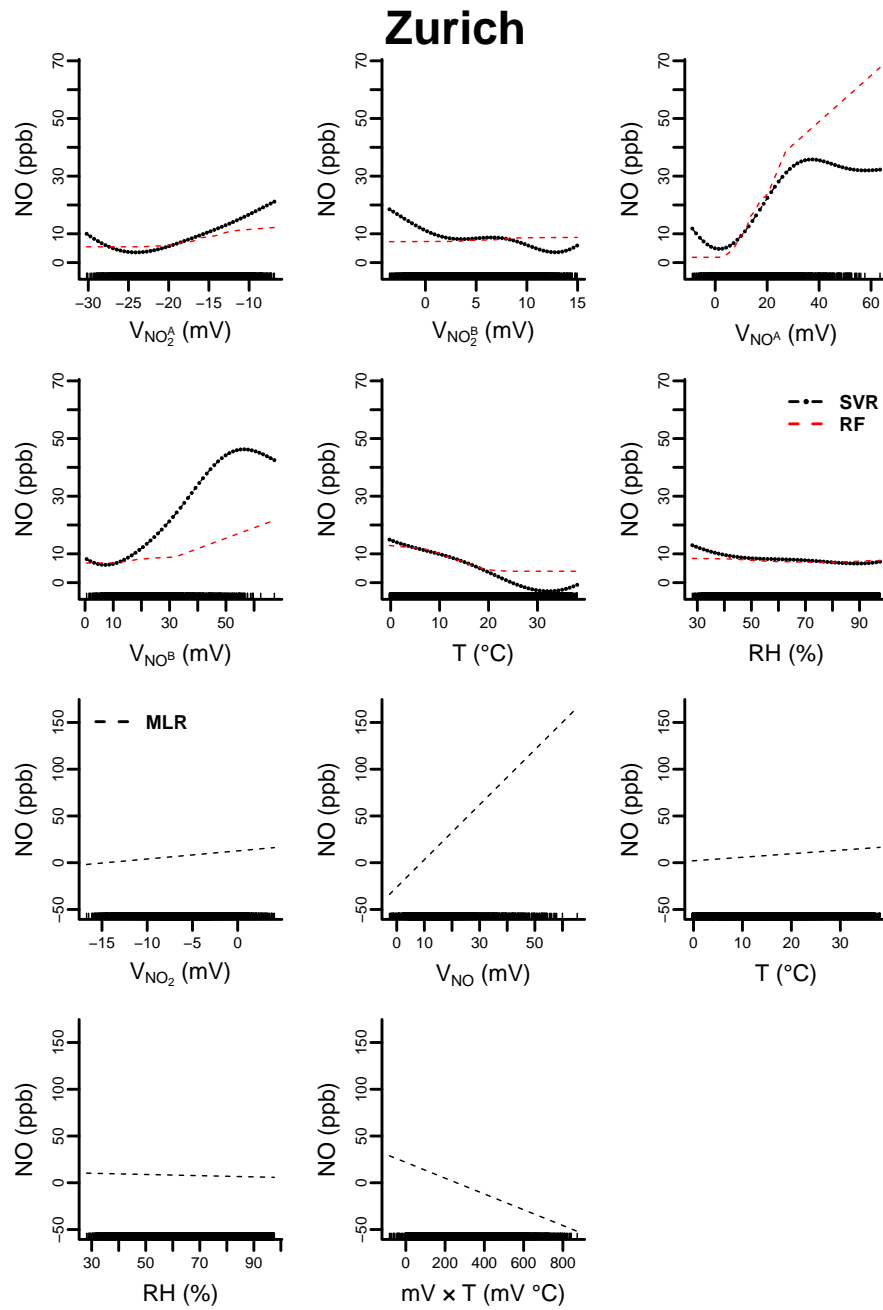

Figure S15: Partial plots for SVM, RF and MLR for the deployment dataset from SU010, NO. Rug on the abscissa indicates the range of the covariate.

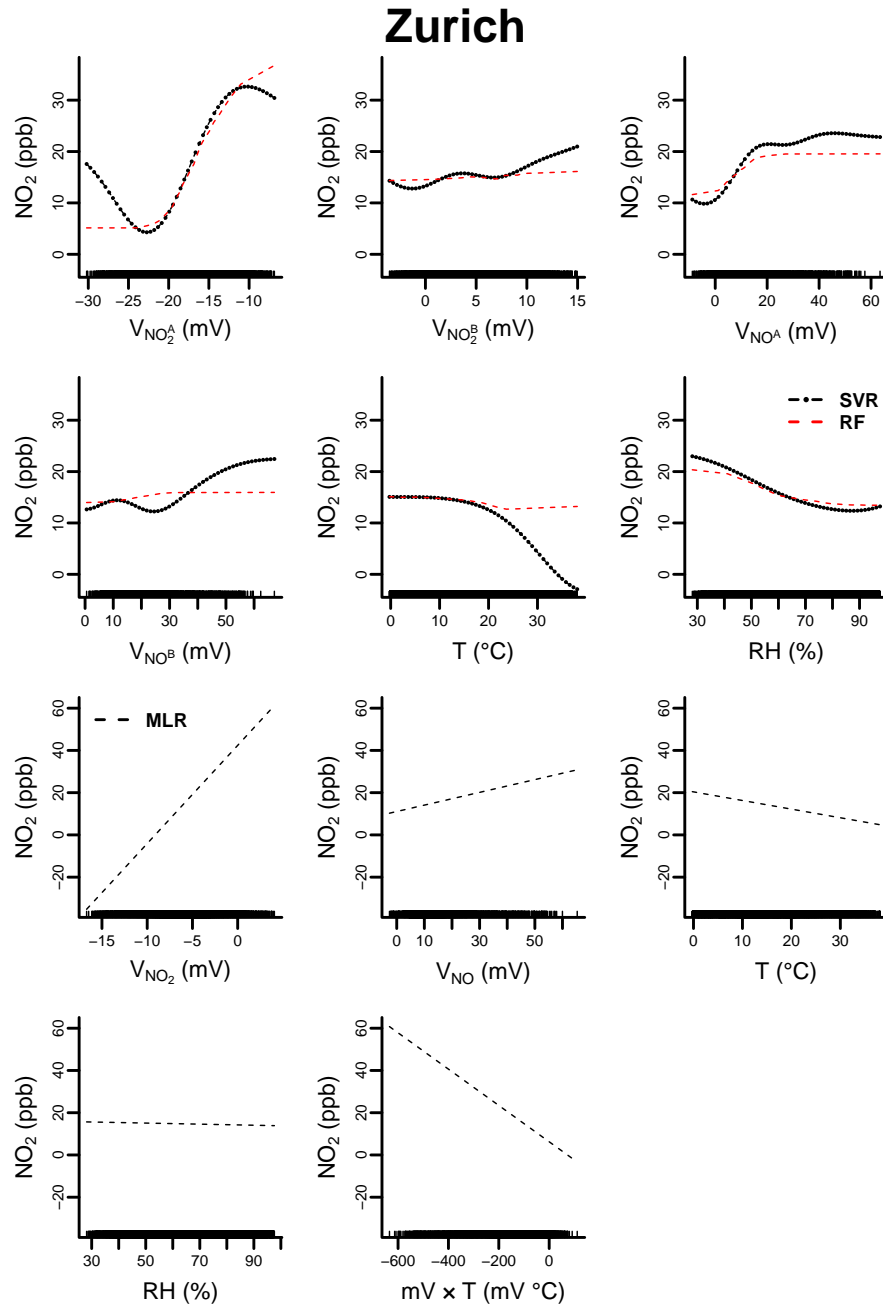

Figure S16: Partial plots for SVM, RF and MLR for the deployment dataset from SU010,  $\text{NO}_2$ . Rug on the abscissa indicates the range of the covariate.

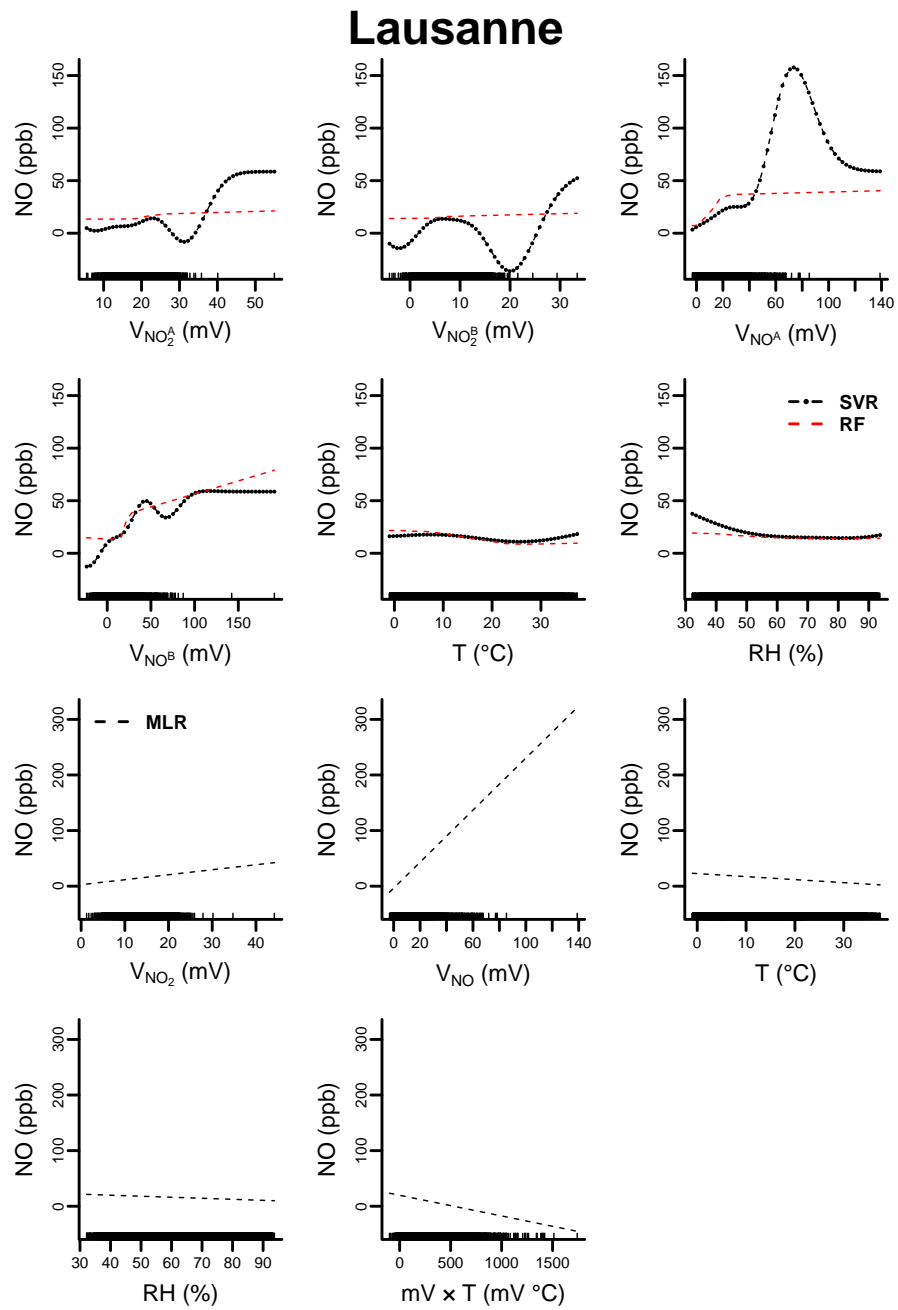

Figure S17: Partial plots for SVM, RF and MLR for the deployment dataset from SU011, NO. Rug on the abscissa indicates the range of the covariate.



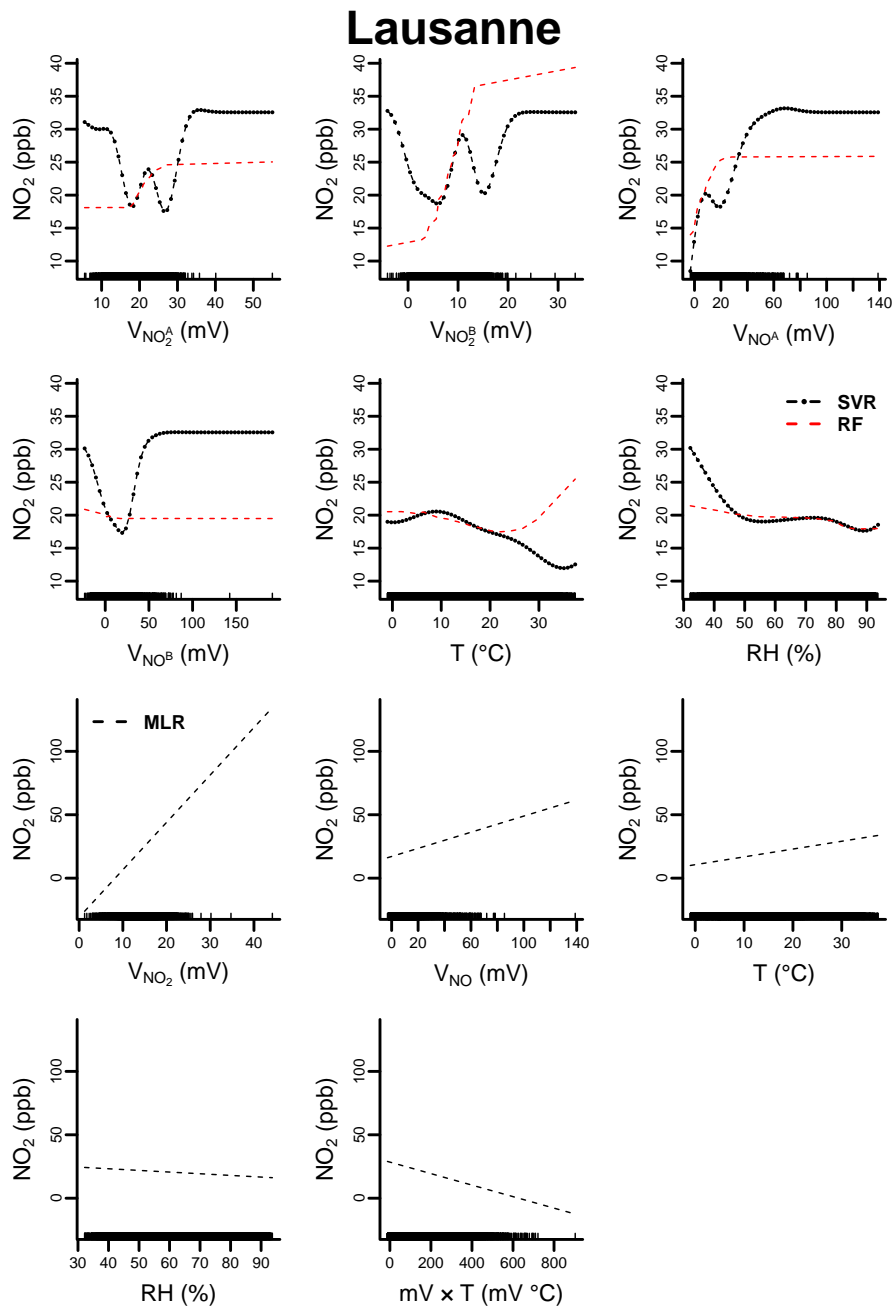

Figure S18: Partial plots for SVM, RF and MLR for the deployment dataset from SU011,  $\text{NO}_2$ . Rug on the abscissa indicates the range of the covariate.

## Lausanne

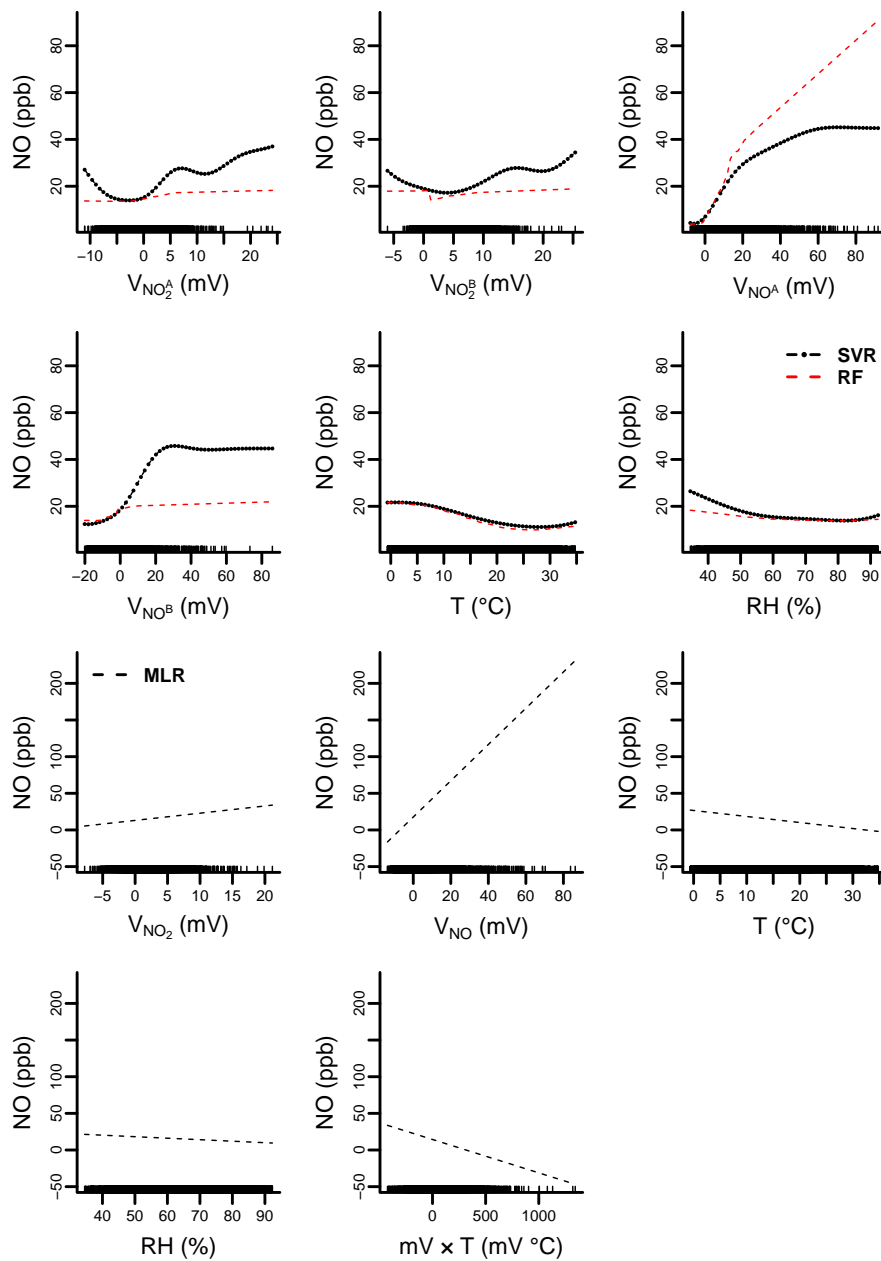

Figure S19: Partial plots for SVM, RF and MLR for the deployment dataset from SU012, NO. Rug on the abscissa indicates the range of the covariate.

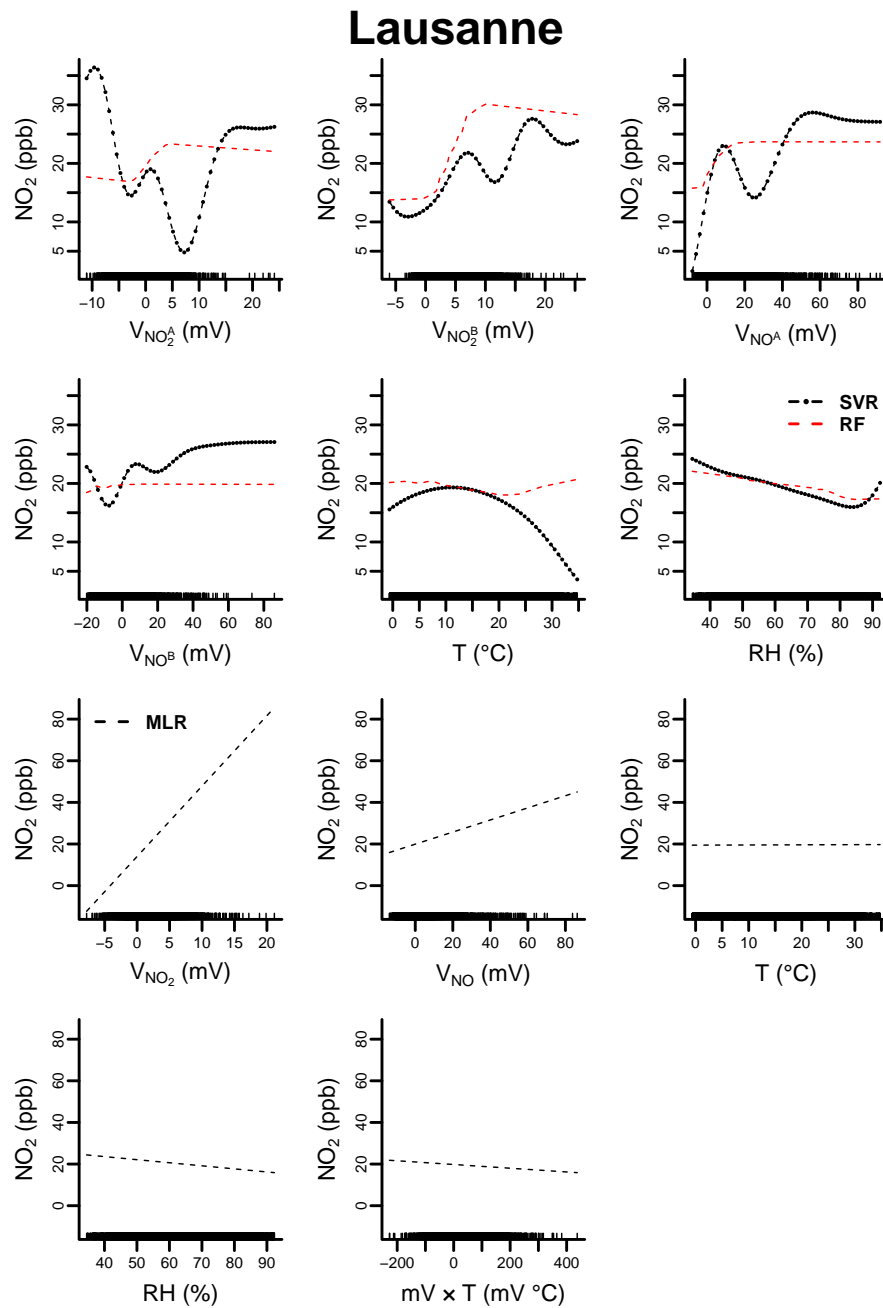

Figure S20: Partial plots for SVM, RF and MLR for the deployment dataset from SU012,  $\text{NO}_2$ . Rug on the abscissa indicates the range of the covariate.

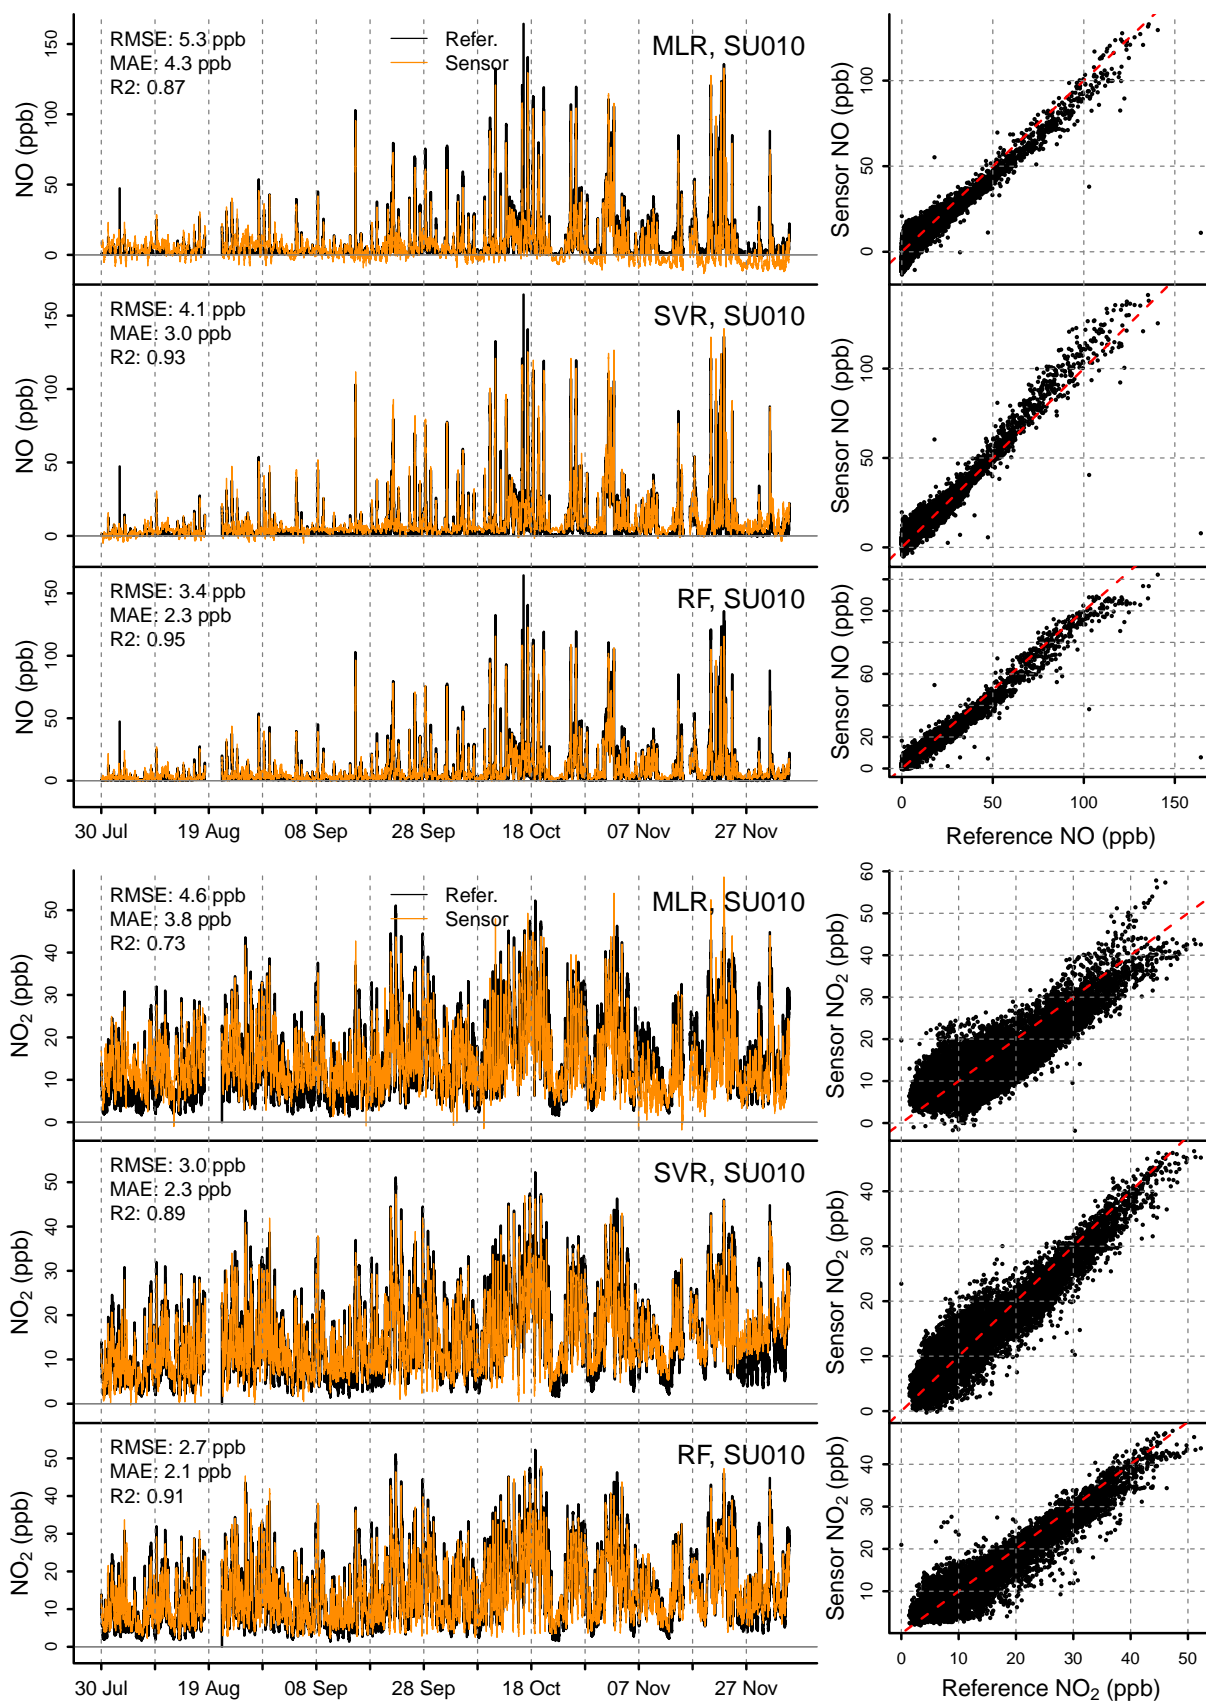

Figure S21: Comparison of NO (top) and NO<sub>2</sub> (bottom) estimates by SU010 with observations by reference instruments, at the urban background site Zurich-Kaserne. 1:1 red dashed line is added in the scatterplots.

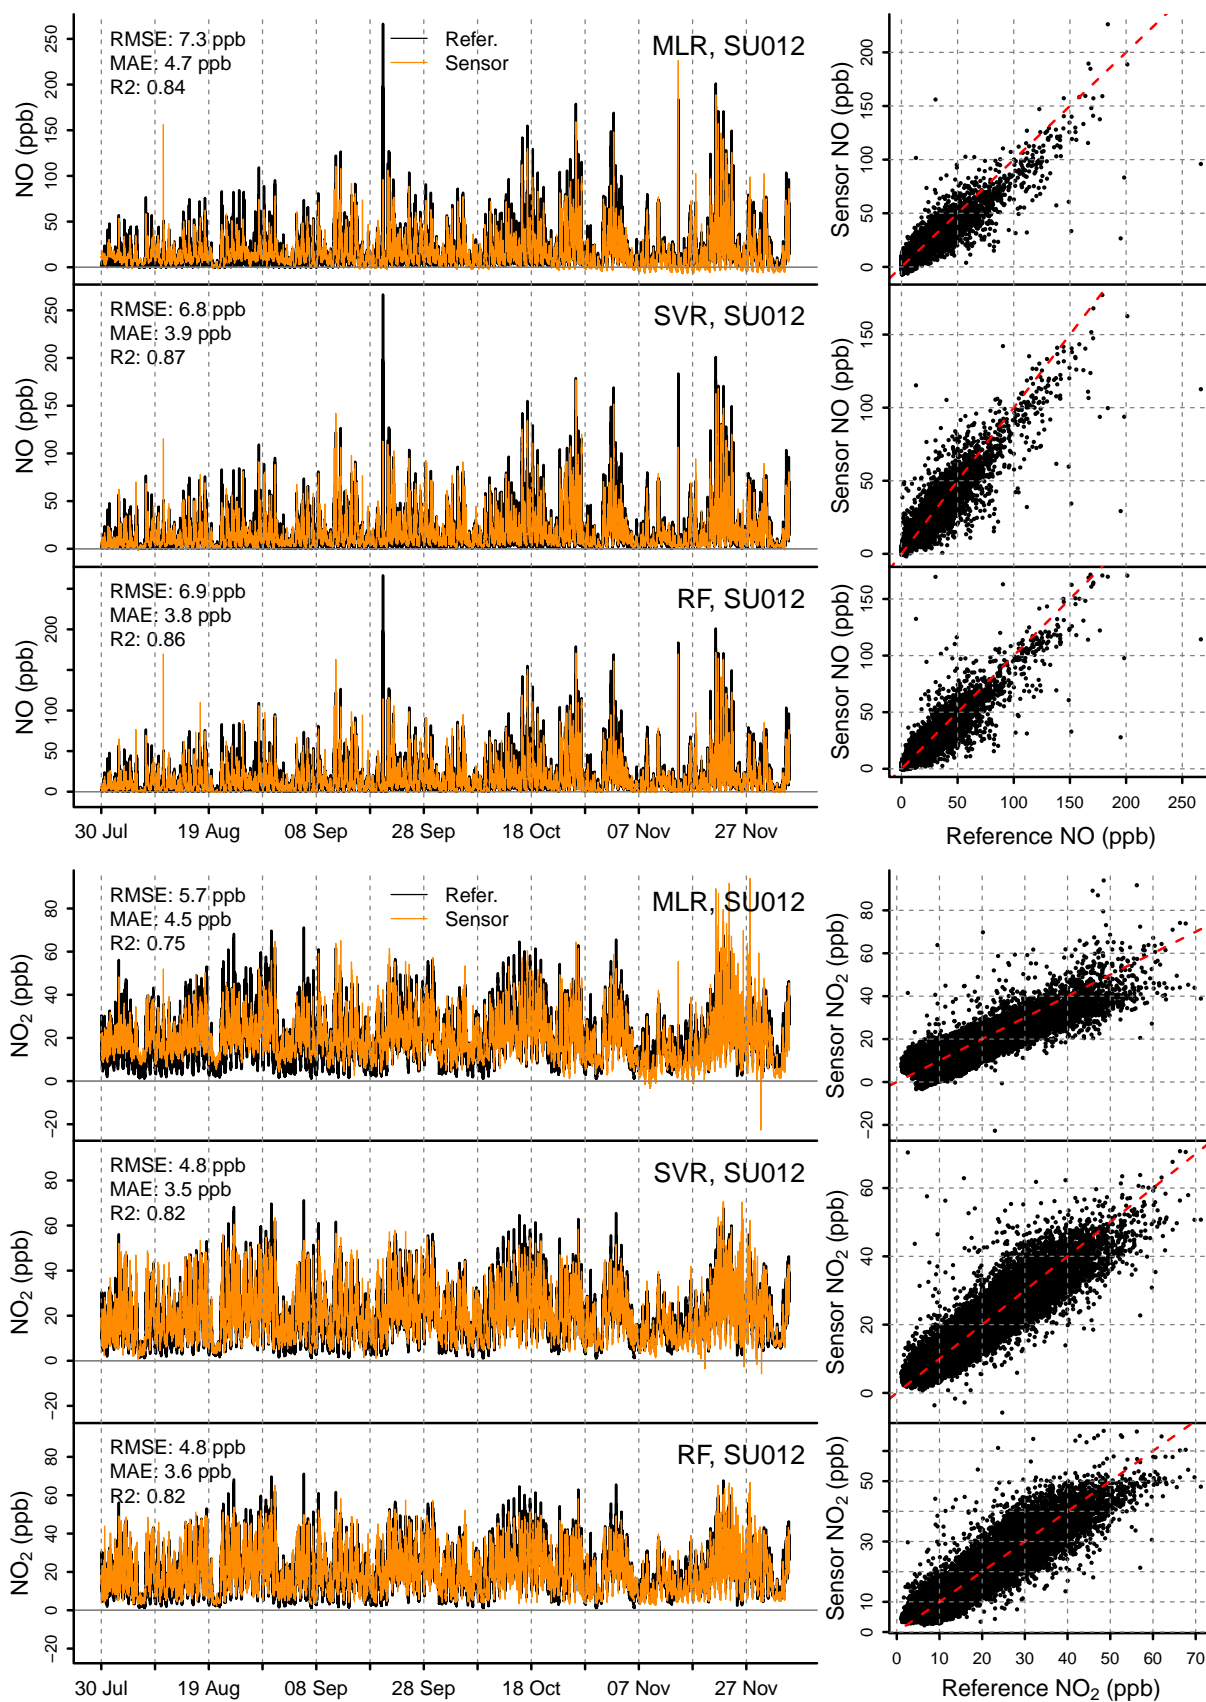

Figure S22: Comparison of NO (top) and NO<sub>2</sub> (bottom) estimates by SU012 with observations by reference instruments, at the urban traffic site of Lausanne. 1:1 red dashed line is added in the scatterplots.

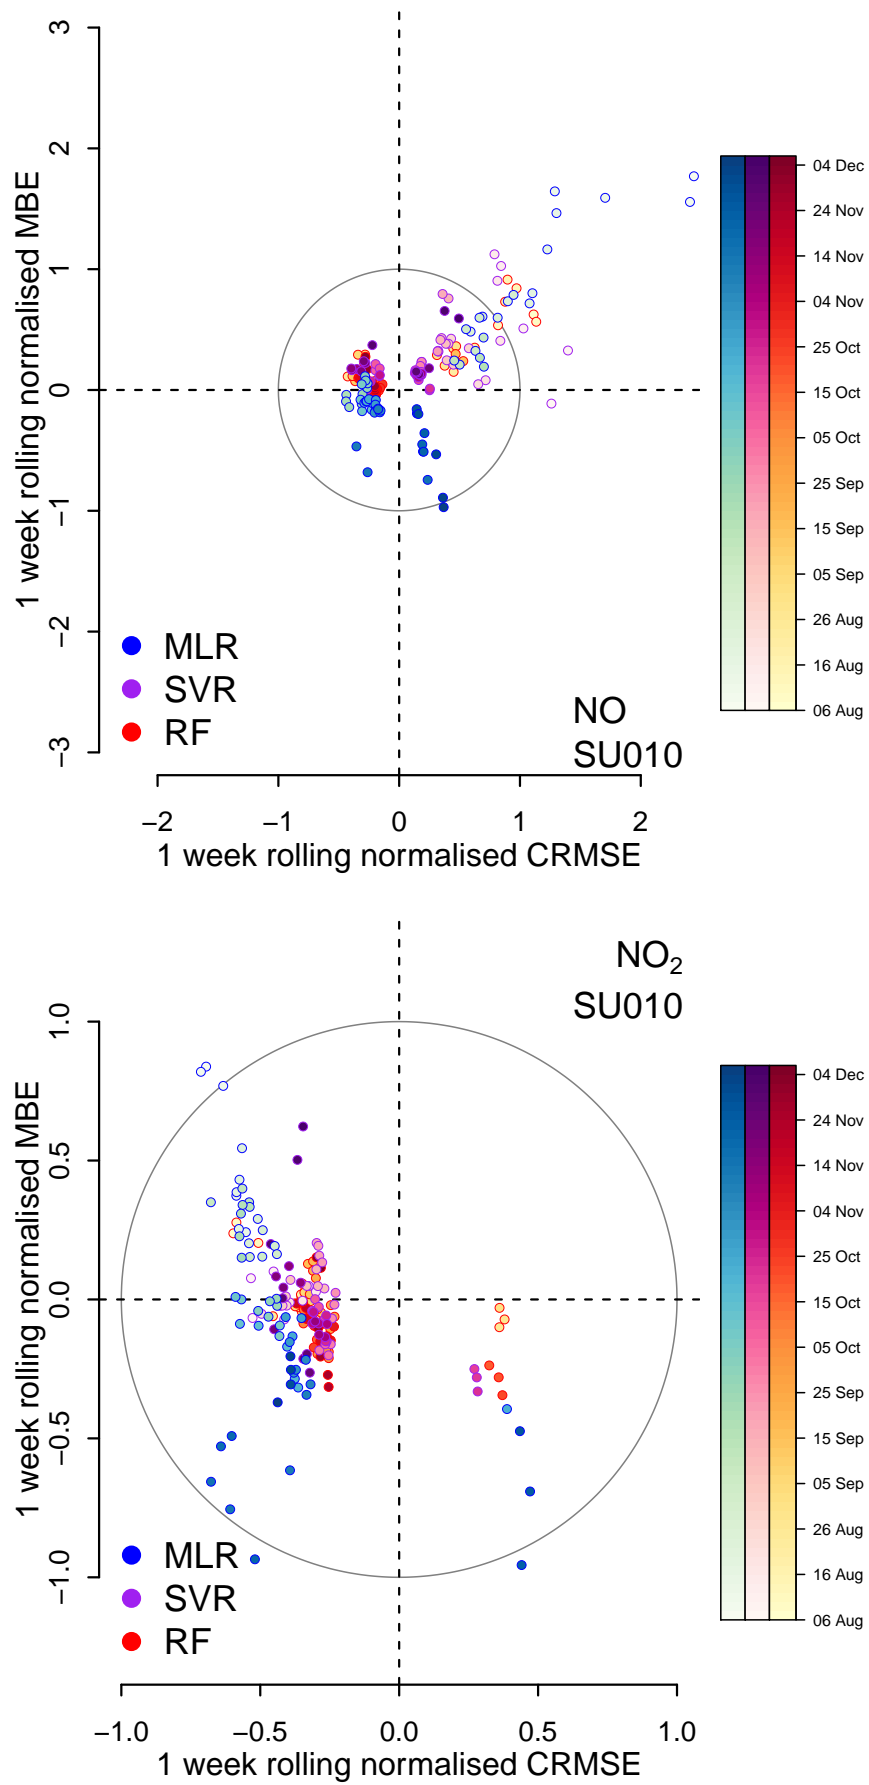

Figure S23: Target plot for the NO (top) and NO<sub>2</sub> (bottom) estimate by SU010, in Zurich urban background.

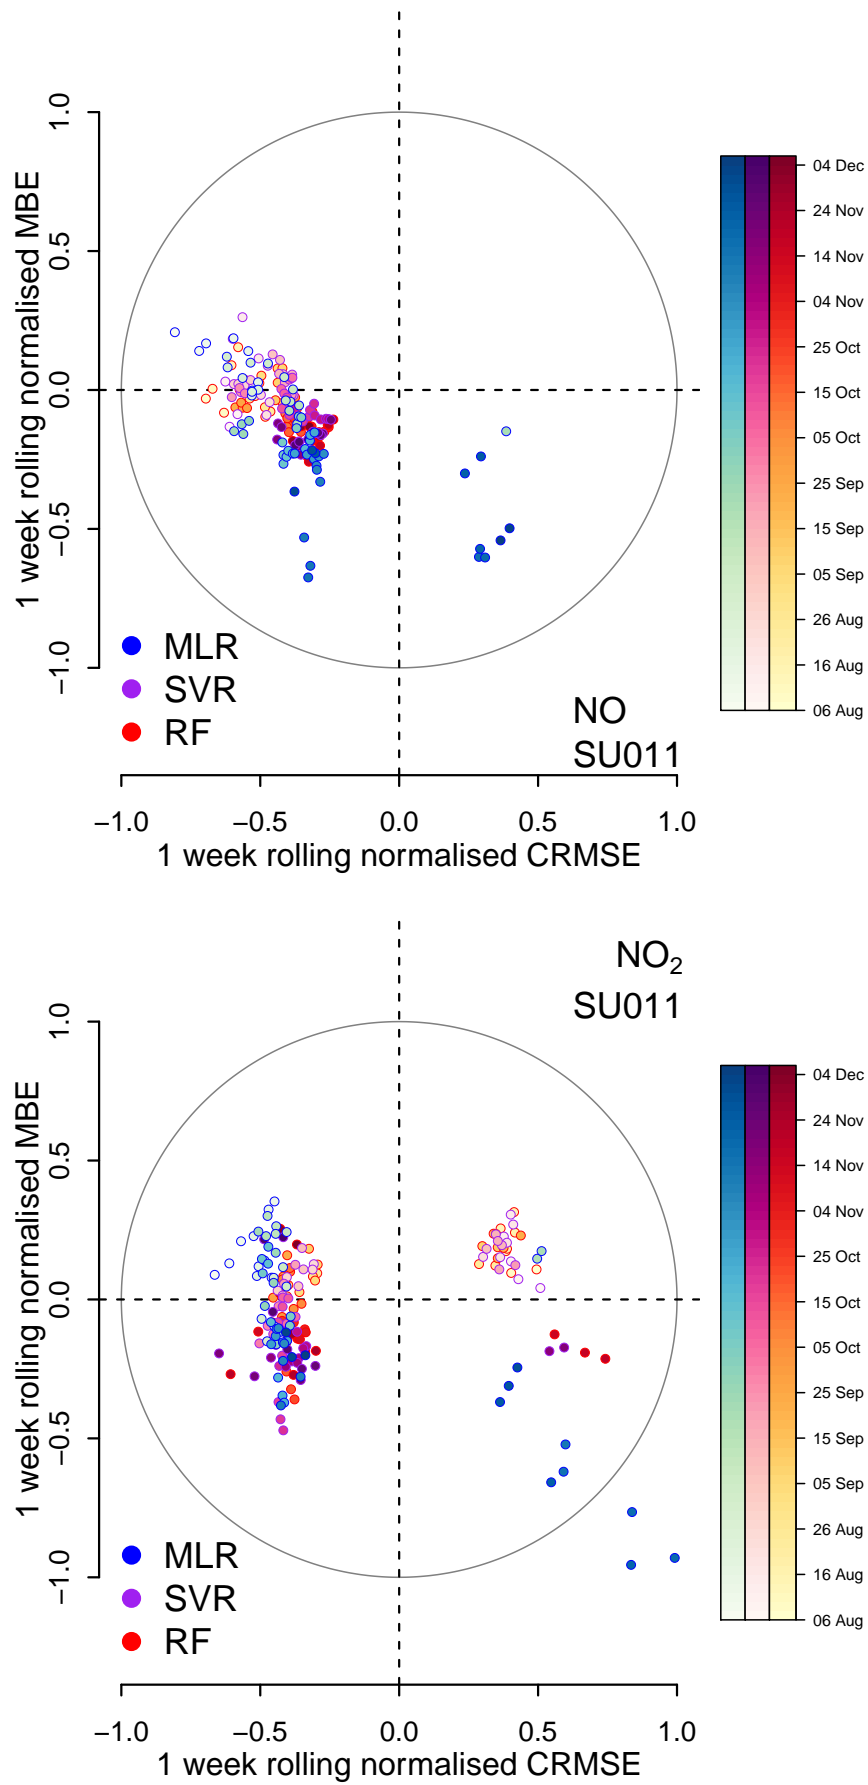

Figure S24: Target plot for the NO (top) and NO<sub>2</sub> (bottom) estimate by SU011, in Lausanne urban traffic.

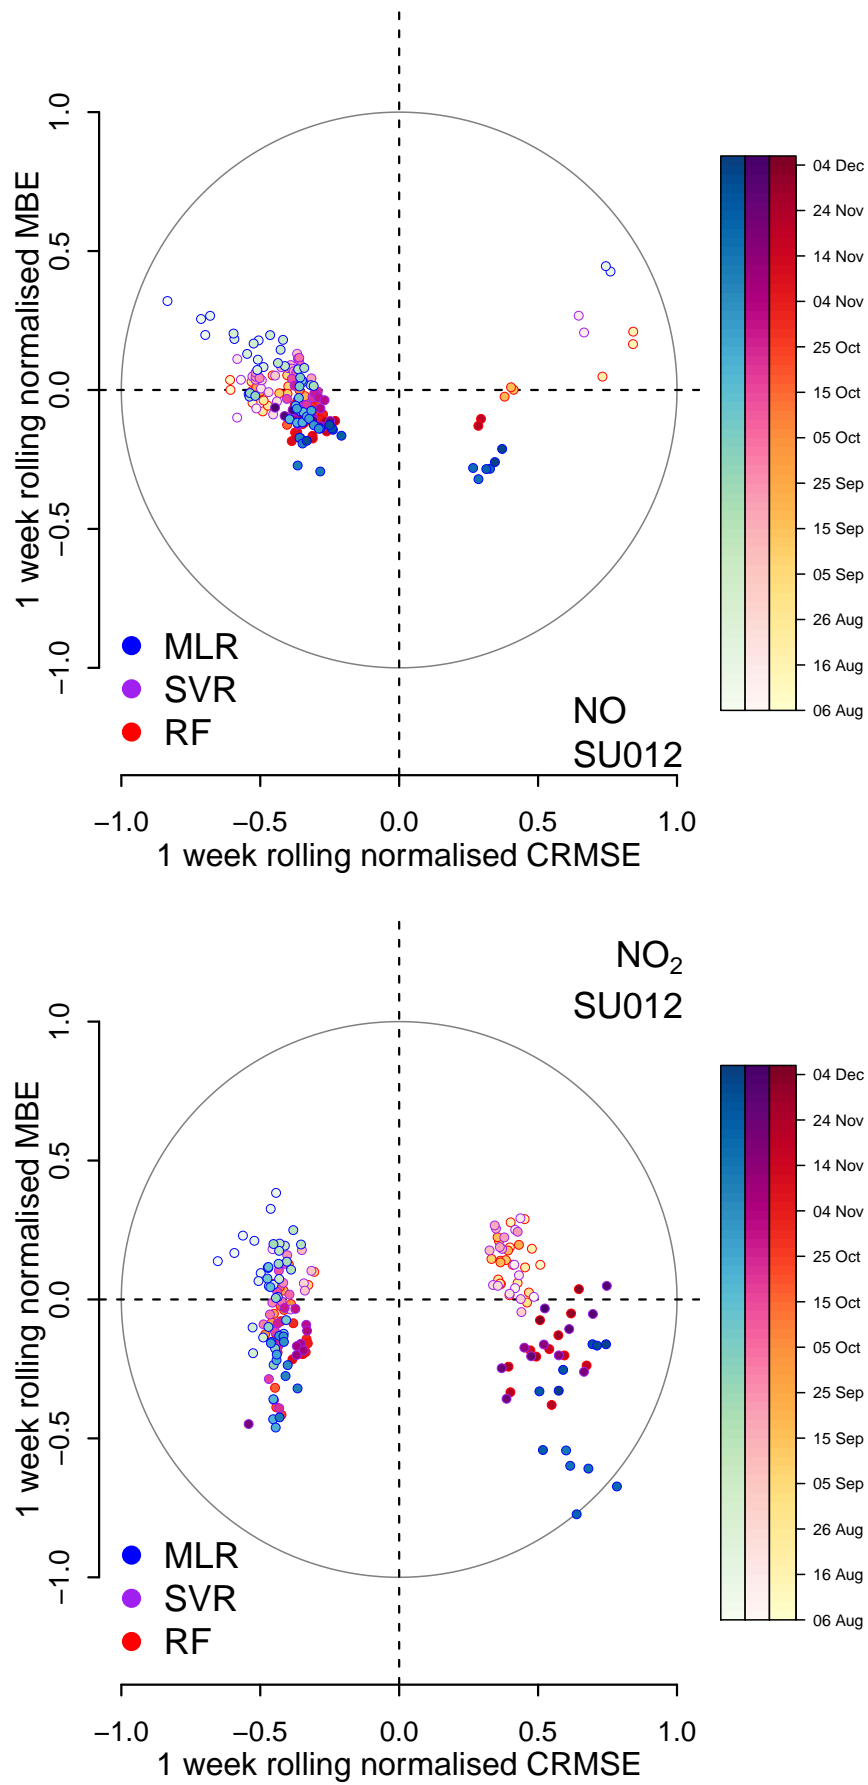

Figure S25: Target plot for the NO (top) and NO<sub>2</sub> (bottom) estimate by SU012, in Lausanne urban traffic.



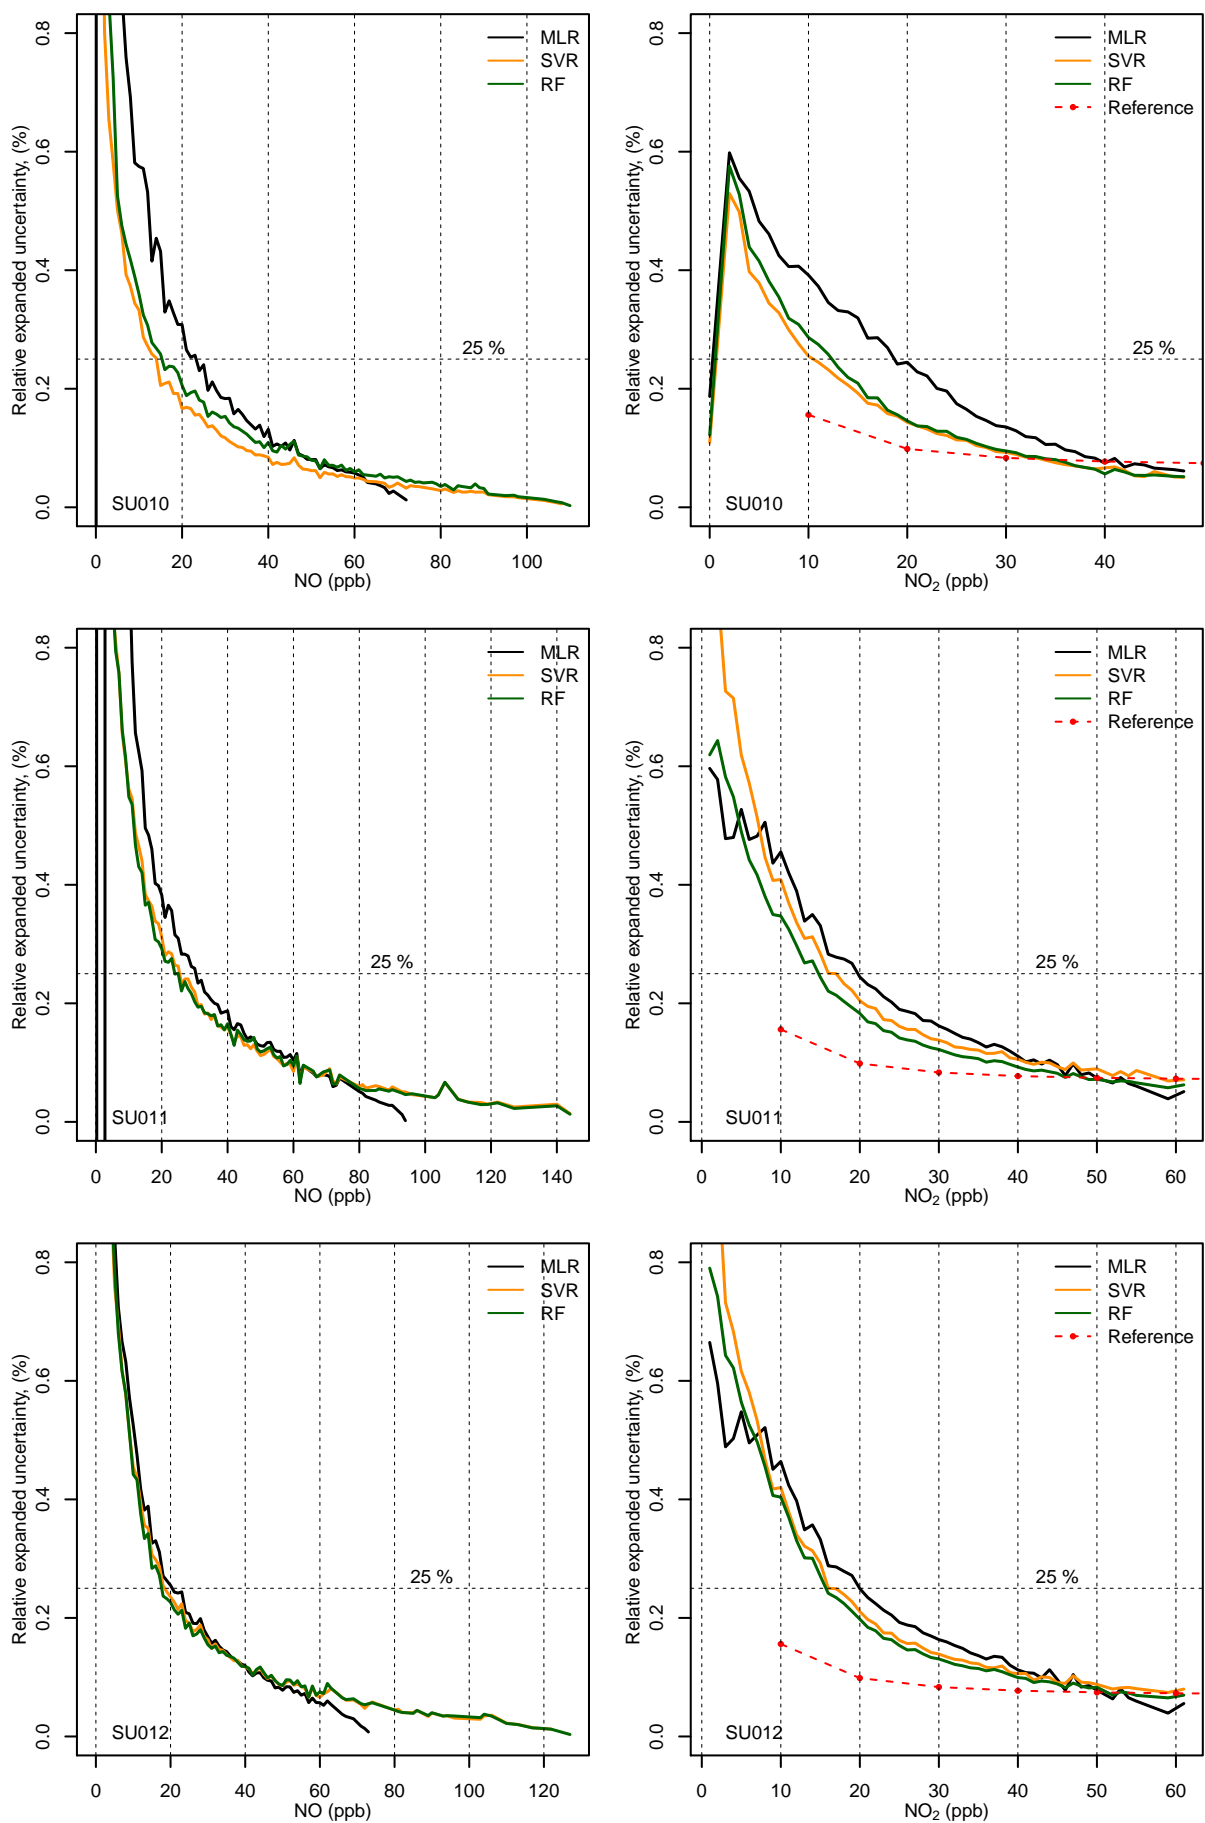

Figure S26: Comparison of expanded relative uncertainty and reference NO and NO<sub>2</sub> concentration for the SU010, SU011 and SU012, using 1 hour average data.

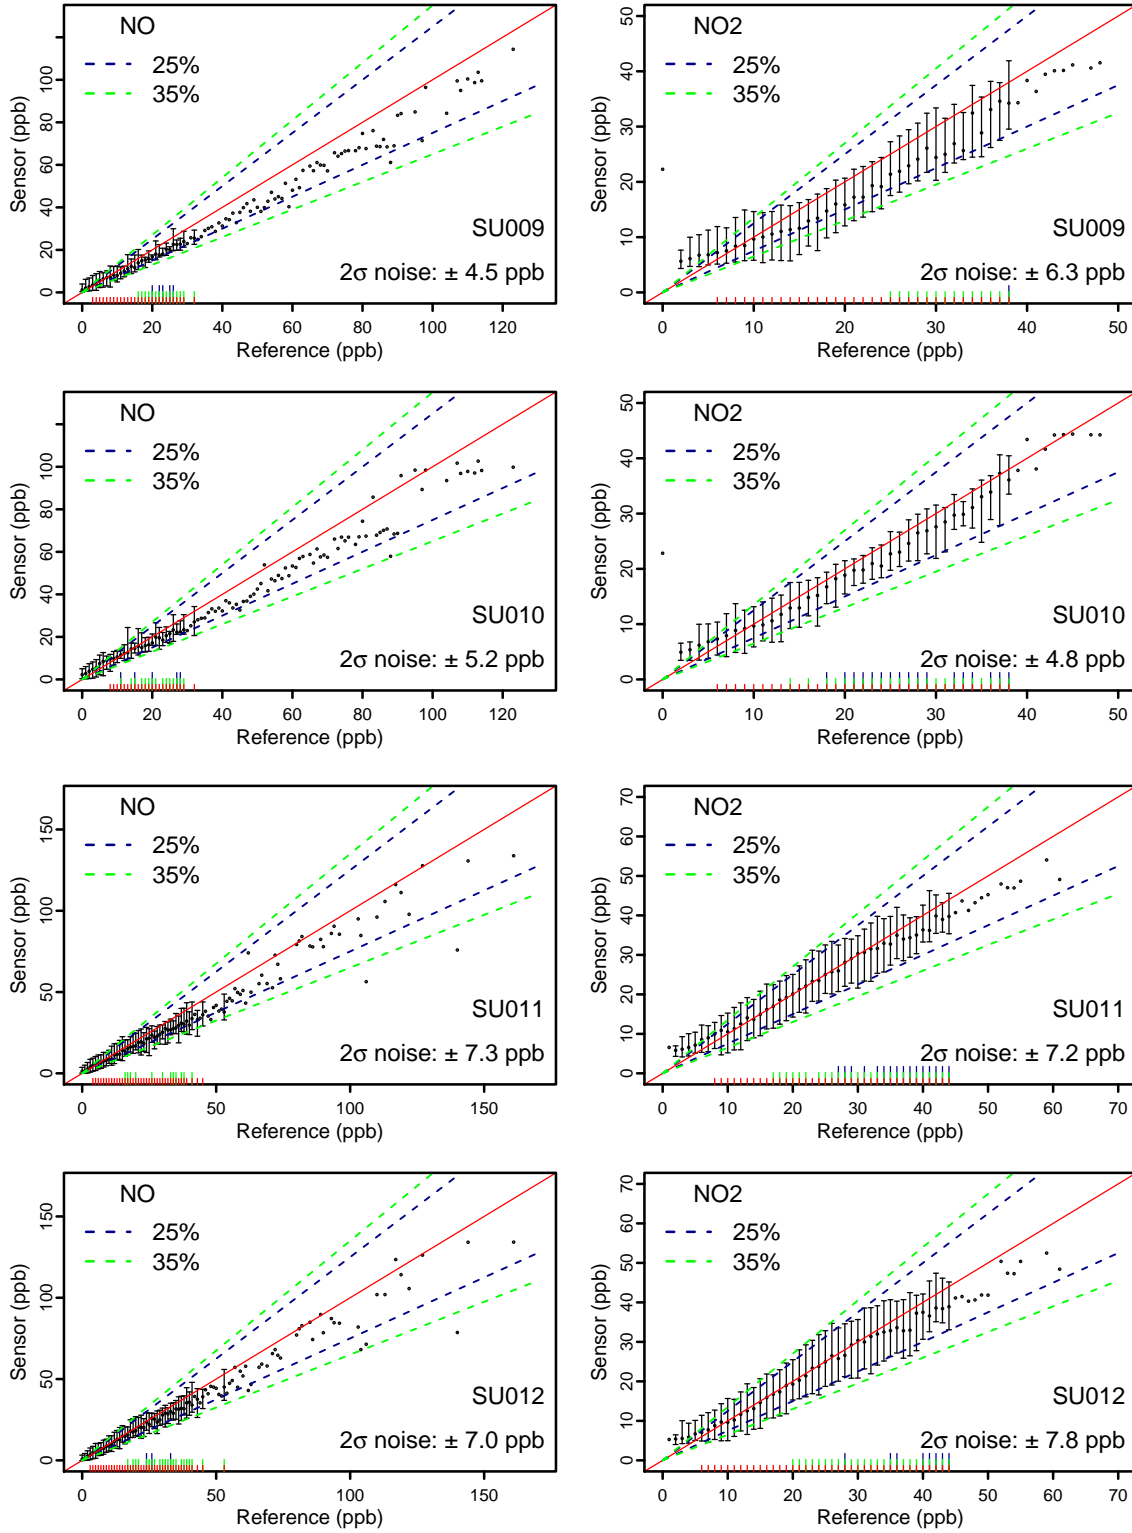

Figure S27: Range of the output using RF algorithm at the deployment sites. The reference data were binned by 1 ppb concentration interval. For each bin the median of the concentration estimated by the sensing device. When at least 10 readings were available, the 5th and 95th quantiles were included. 1:1 dashed line is added, along with its 25% and 35% uncertainty bands. Bottom red rug indicates if the median of sensor estimate is included in the 25% uncertainty bounds. Bottom green (blue) rug indicates if the 5–95% percentile range of estimates is included in the 35% (25%) uncertainty range.

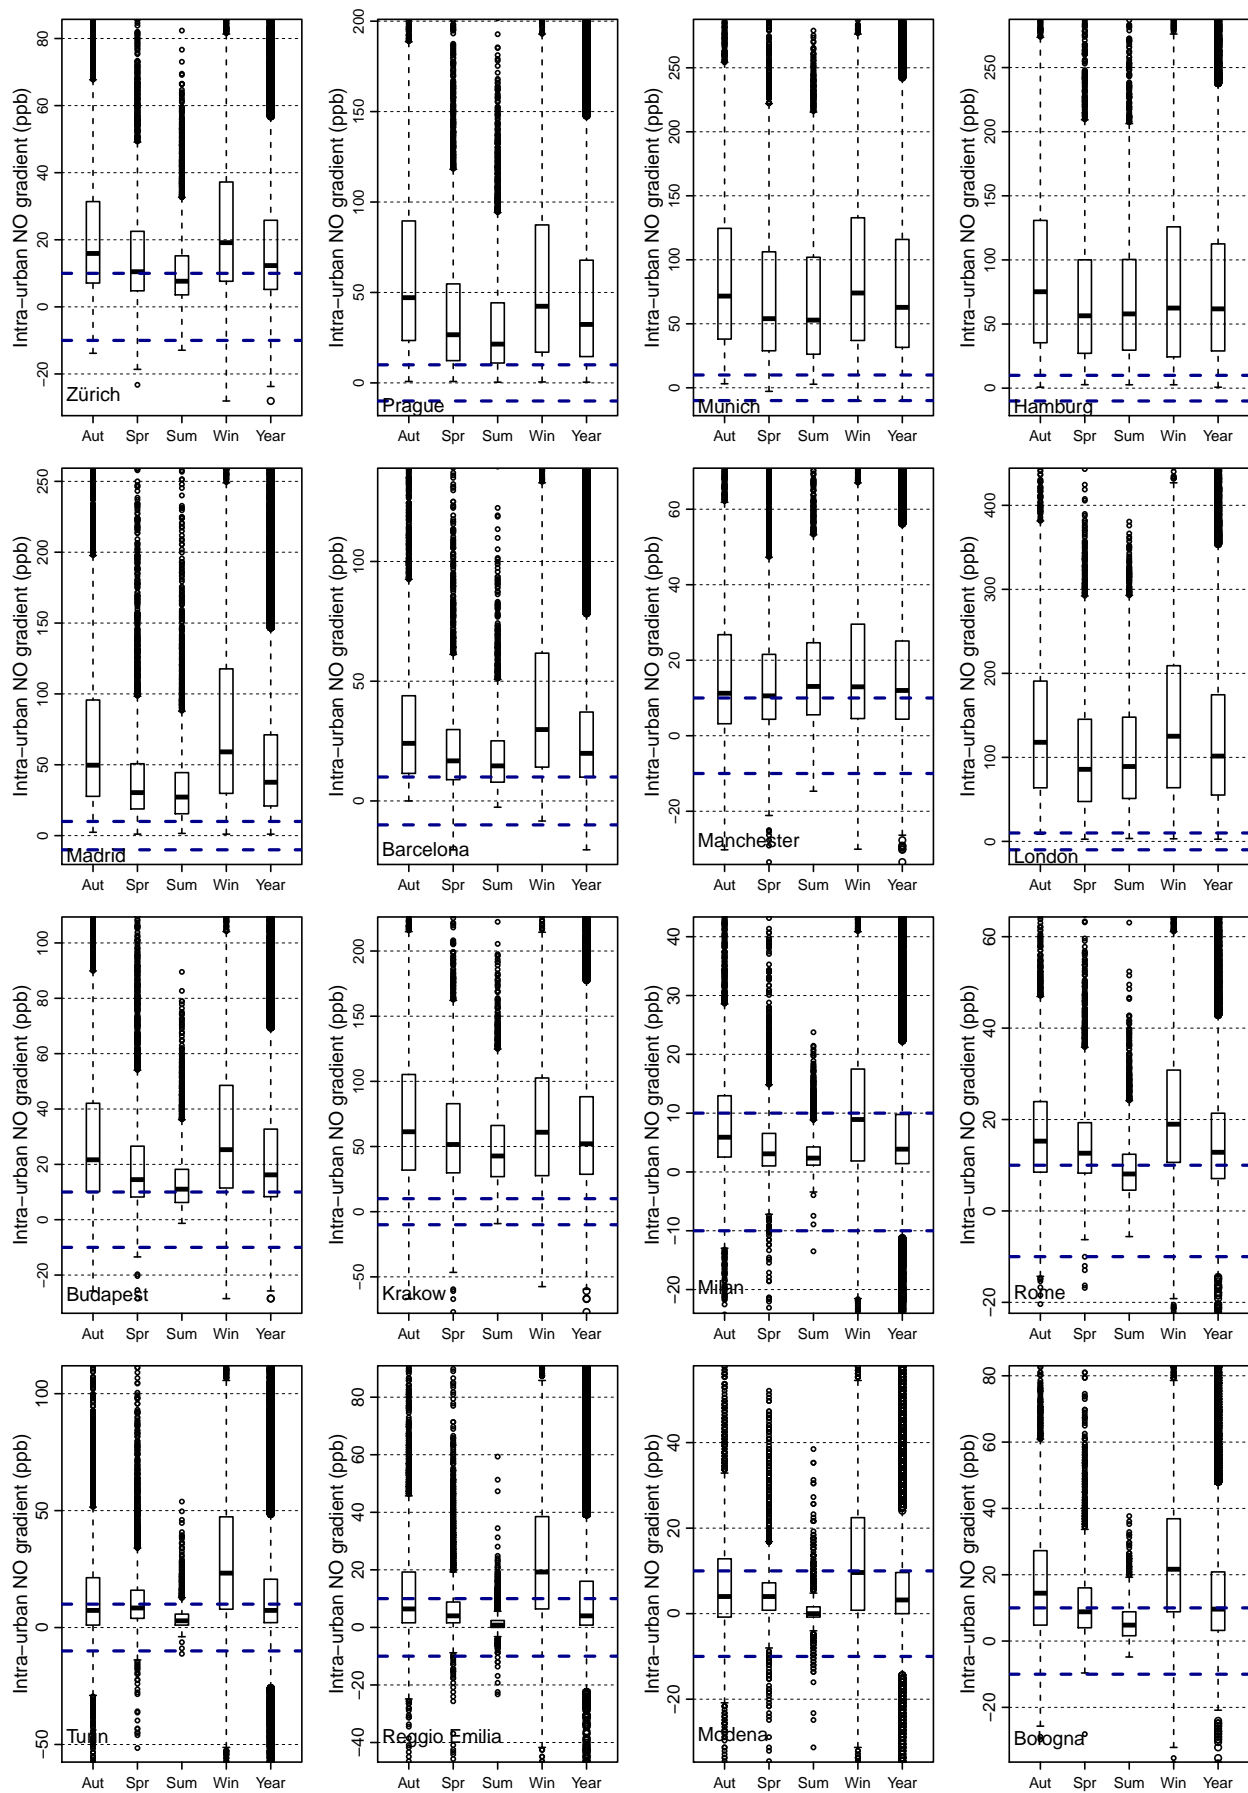

Figure S28: Seasonal boxplots of intra-urban NO gradient in a pool of European cities, proceeding from the station pairs having the largest difference in NO, on a hourly basis. Blue dashed lines indicate  $\pm 10$  ppb.

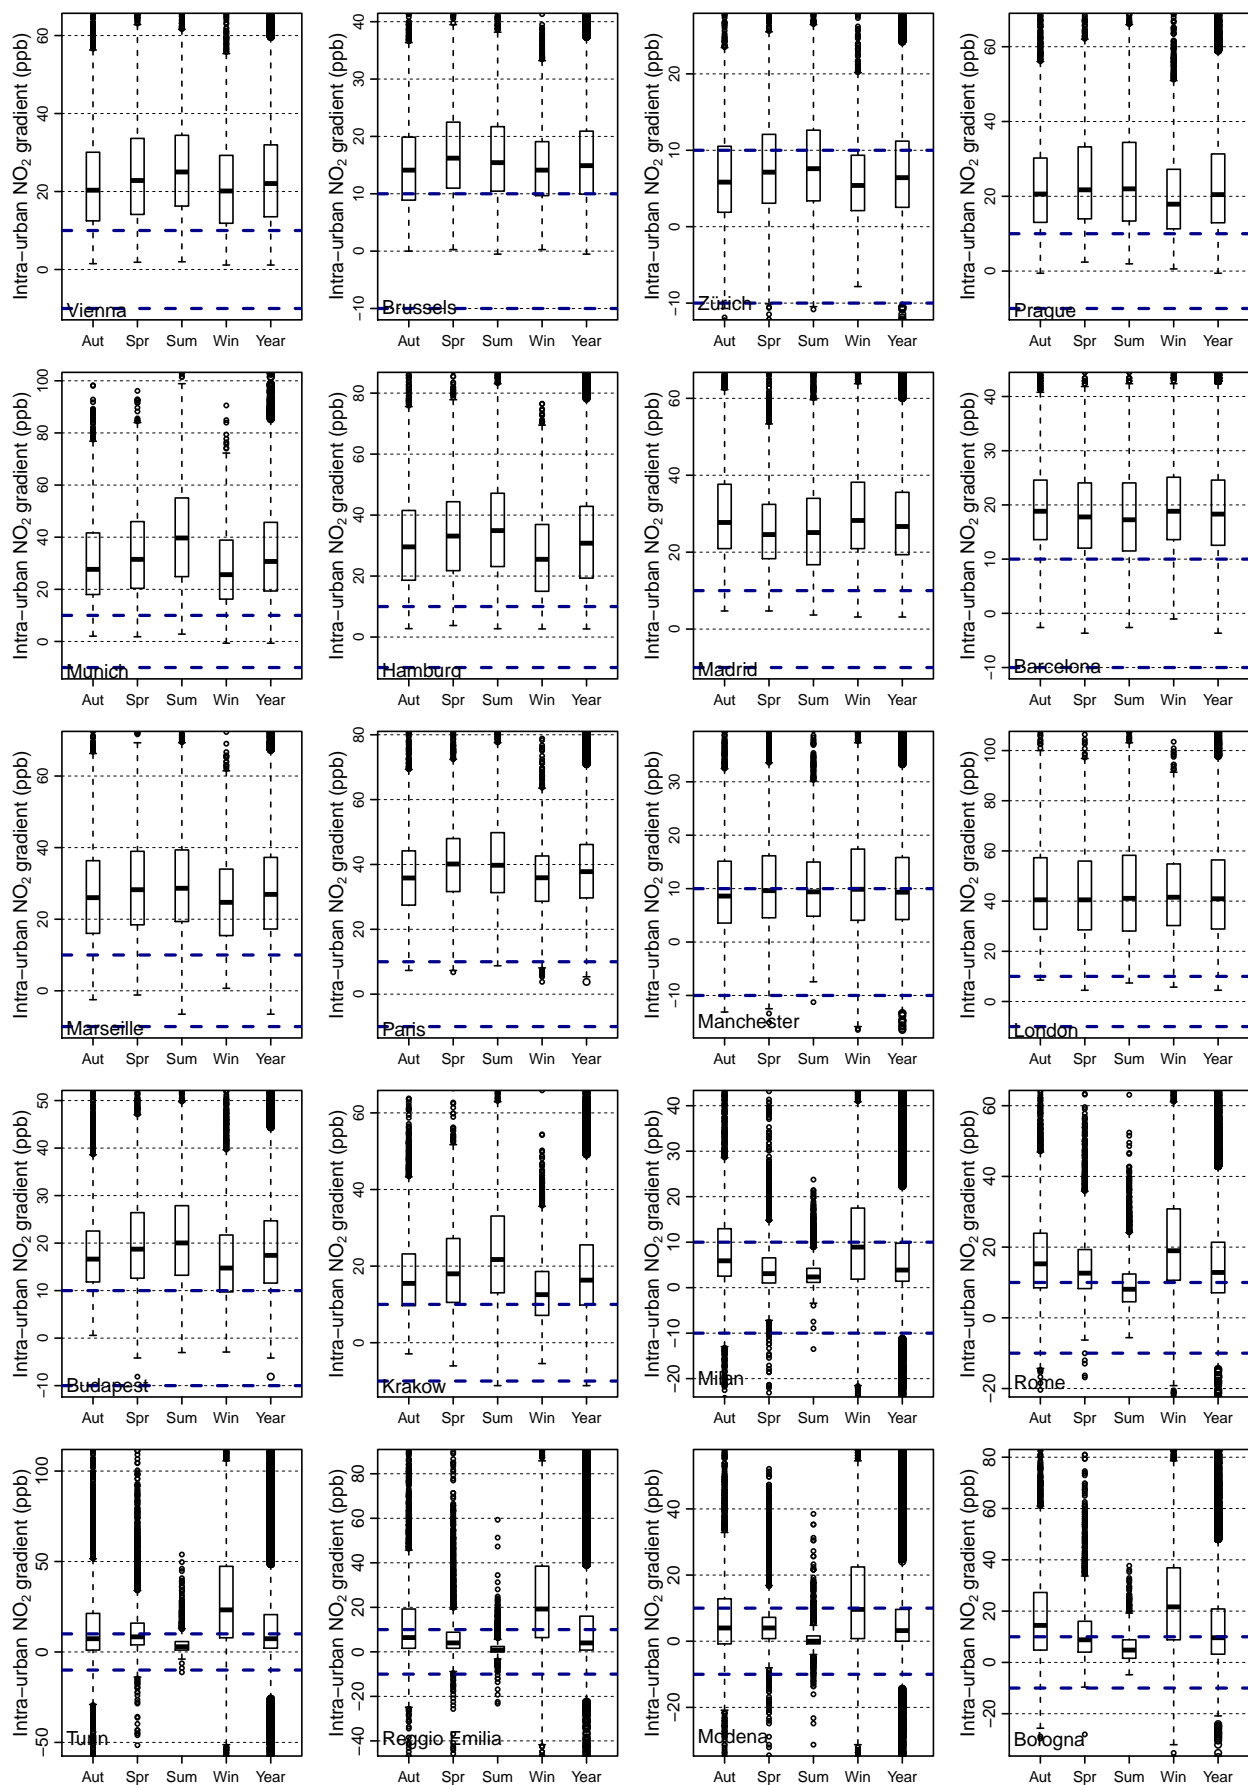

Figure S29: Seasonal boxplots of intra-urban  $\text{NO}_2$  gradient in a pool of European cities, proceeding from the station pairs having the largest difference in  $\text{NO}_2$ , on a hourly basis. Blue dashed lines indicate  $\pm 10$  ppb.

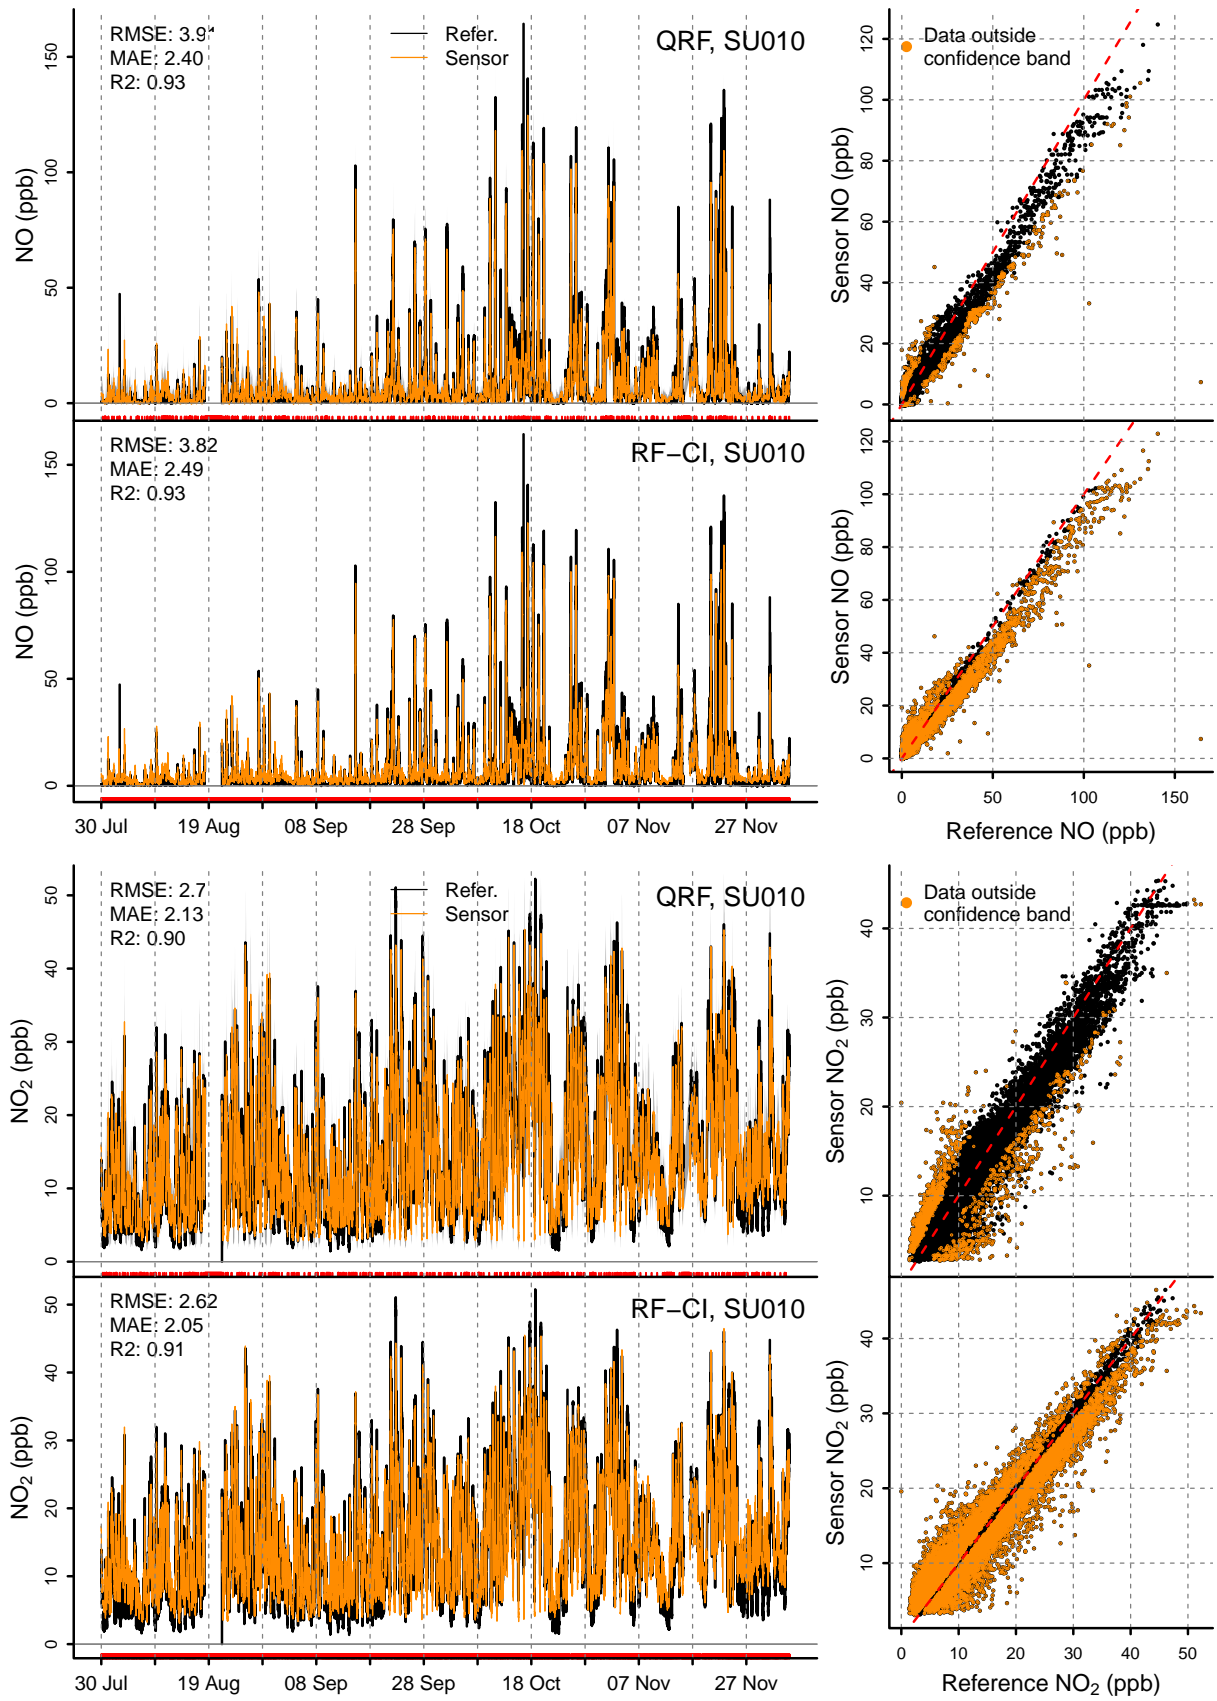

Figure S30: Comparison of QRF and CI-RF estimates of NO (top) and NO<sub>2</sub> (bottom) by SU010 with observations by reference instruments. 1:1 red dashed line is added in the scatterplots.

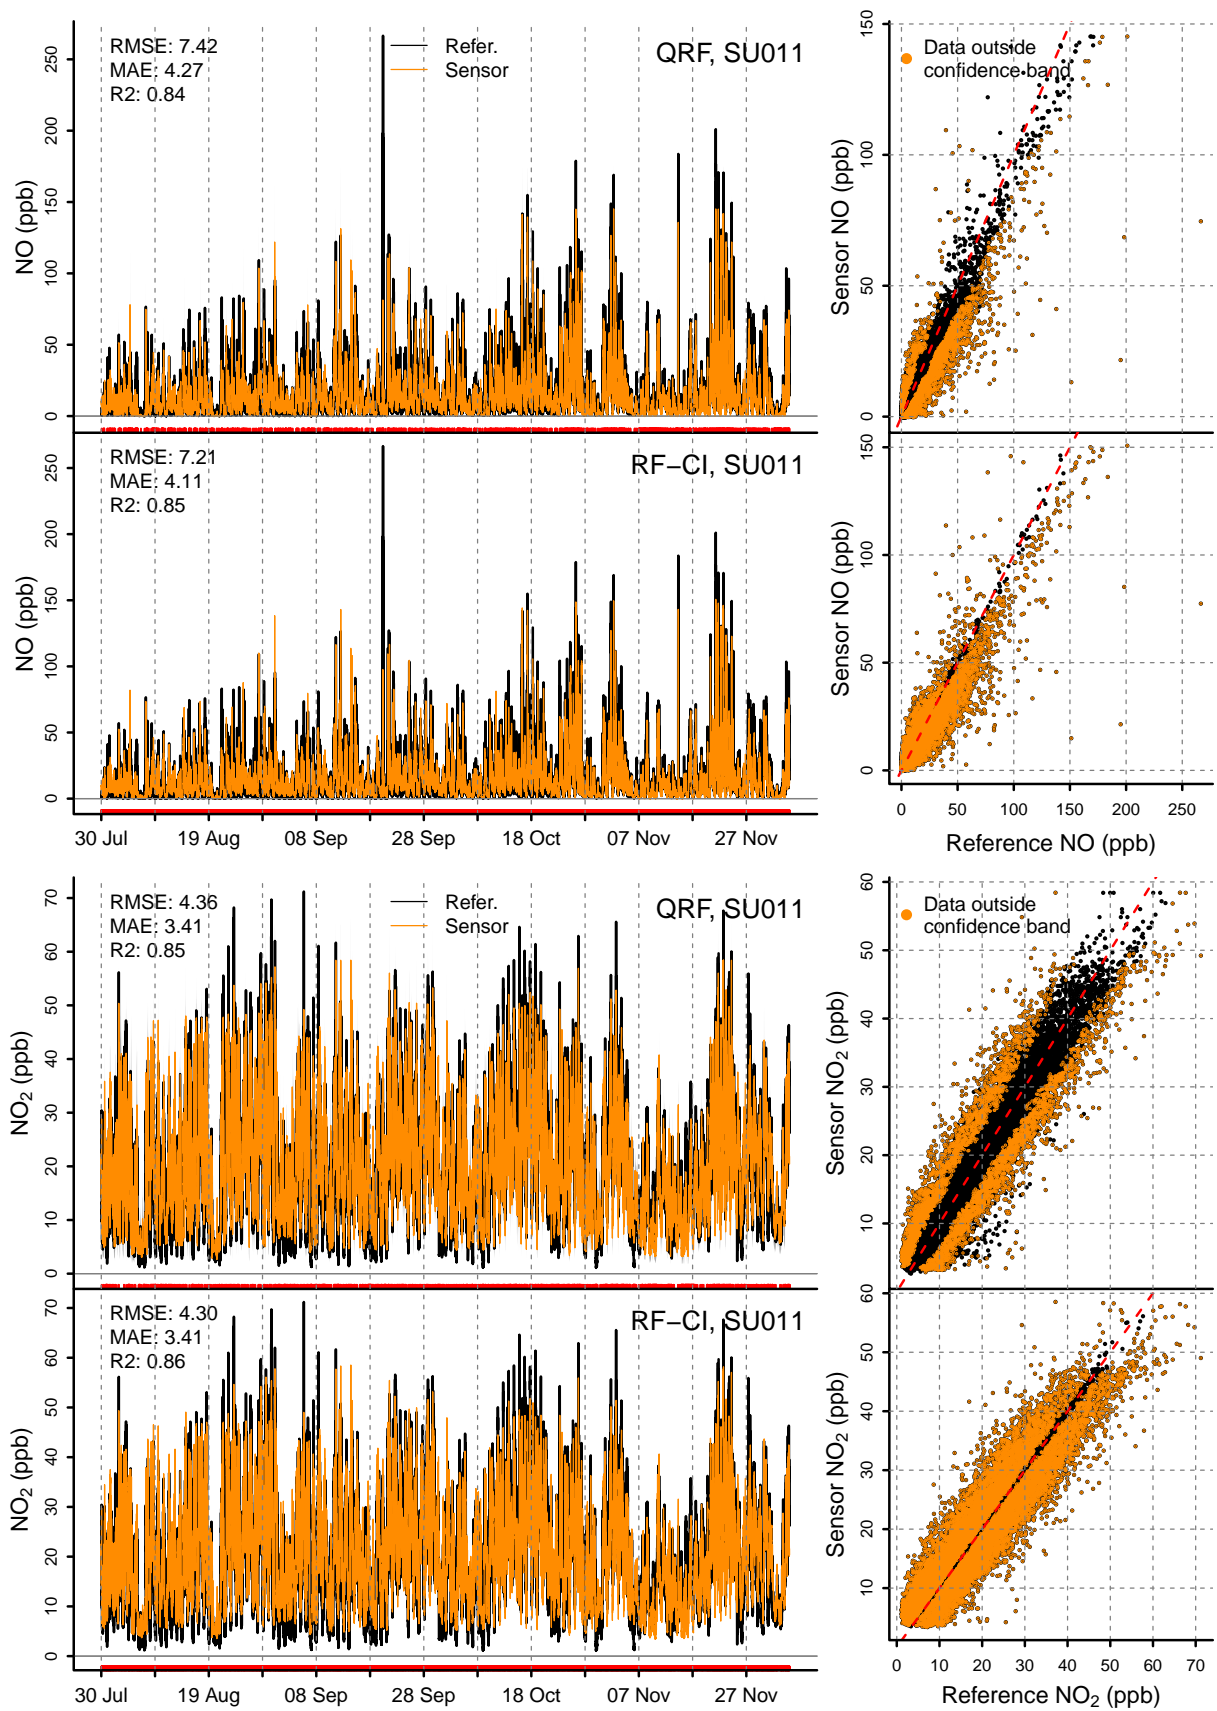

Figure S31: Comparison of QRF and CI-RF estimates of NO (top) and NO<sub>2</sub> (bottom) by SU011 with observations by reference instruments. 1:1 red dashed line is added in the scatterplots.



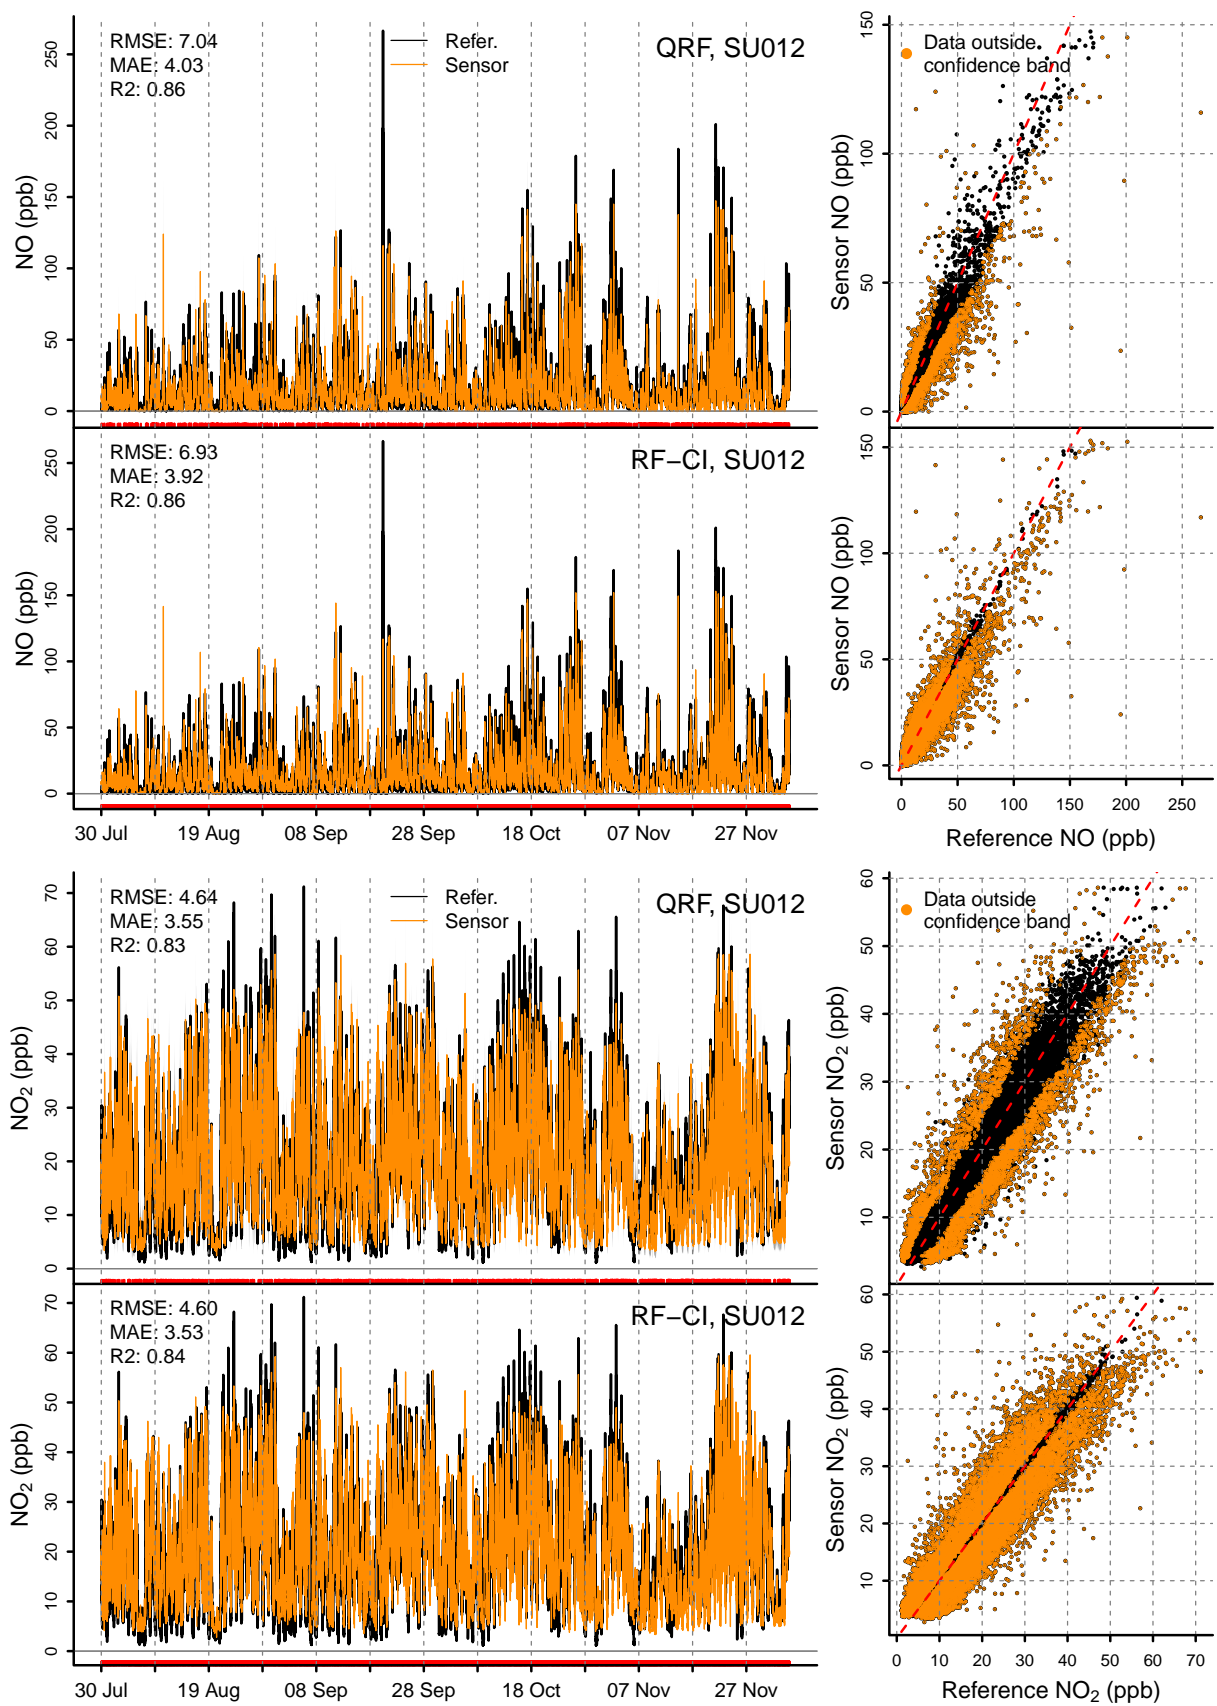

Figure S32: Comparison of QRF and CI-RF estimates of NO (top) and NO<sub>2</sub> (bottom) by SU012 with observations by reference instruments. 1:1 red dashed line is added in the scatterplots.
